# Supplementary material for: Origin of exon skipping-rich transcriptomes in animals driven by evolution of gene architecture
Source: Springer Nature journal article supplement (doi:10.1186/s13059-018-1499-9), 2018-09-17
Supplement: 13059_2018_1499_MOESM1_ESM.pdf [file 13059_2018_1499_MOESM1_ESM.pdf]

| Species                                                 | Abbr.   | Genome sequence and annotation                  | Transcriptomes                                                                                                    | Taxonomy                        |            |               |              |                |
|---------------------------------------------------------|---------|-------------------------------------------------|-------------------------------------------------------------------------------------------------------------------|---------------------------------|------------|---------------|--------------|----------------|
| <i>Homo sapiens</i>                                     | Hsap    | Ensembl 78                                      | SRP007412 / Brawand 2012<br>SRP056969 / Duff 2015                                                                 | Vertebrata (chordate)           | Metazoa    | Holozoa       | Opisthokonta | Amorphea       |
| <i>Mus musculus</i>                                     | Mmus    | Ensembl 78                                      | SRP007412 / Brawand 2012<br>SRP015997 / Barbosa-Morais 2012                                                       | Vertebrata (chordate)           | Metazoa    | Holozoa       | Opisthokonta | Amorphea       |
| <i>Monodelphis domestica</i>                            | Mdom    | Ensembl 78                                      | SRP007412 / Brawand 2012                                                                                          | Vertebrata (chordate)           | Metazoa    | Holozoa       | Opisthokonta | Amorphea       |
| <i>Ornithorhynchus anatinus</i>                         | Oana    | Ensembl 78                                      | SRP007412 / Brawand 2012                                                                                          | Vertebrata (chordate)           | Metazoa    | Holozoa       | Opisthokonta | Amorphea       |
| <i>Gallus gallus</i>                                    | Ggal    | Ensembl 78                                      | SRP007412 / Brawand 2012                                                                                          | Vertebrata (chordate)           | Metazoa    | Holozoa       | Opisthokonta | Amorphea       |
| <i>Danio rerio</i>                                      | Drex    | Ensembl 78                                      | SRP048807                                                                                                         | Vertebrata (chordate)           | Metazoa    | Holozoa       | Opisthokonta | Amorphea       |
| <i>Xenopus tropicalis</i>                               | Xtro    | Ensembl 78                                      | SRP012375 / Tan 2012<br>SRP015997 / Barbosa-Morais 2012                                                           | Vertebrata (chordate)           | Metazoa    | Holozoa       | Opisthokonta | Amorphea       |
| <i>Ciona intestinalis</i>                               | Cint    | Ensembl 78                                      | SRP042651                                                                                                         | Tunicata (chordate)             | Metazoa    | Holozoa       | Opisthokonta | Amorphea       |
| <i>Branchiostoma belcheri</i>                           | Brabel  | PRJNA214454                                     | SRP025148                                                                                                         | Urochordata (chordate)          | Metazoa    | Holozoa       | Opisthokonta | Amorphea       |
| <i>Strongylocentrotus purpuratus</i>                    | Spur2   | Ensembl Metazoa 27                              | GSE97267 / Burguera 2017                                                                                          | Echinodermata                   | Metazoa    | Holozoa       | Opisthokonta | Amorphea       |
| <i>Drosophila melanogaster</i>                          | Dmel    | Ensembl Metazoa 27                              | SRP001696 / modENCODE 2011<br>SRP082392 / Katzenberger 2016                                                       | Ecdysozoa                       | Metazoa    | Holozoa       | Opisthokonta | Amorphea       |
| <i>Caenorhabditis elegans</i>                           | Cele    | Ensembl 78                                      | SRP000401                                                                                                         | Ecdysozoa                       | Metazoa    | Holozoa       | Opisthokonta | Amorphea       |
| <i>Crassostrea gigas</i>                                | Cgig    | Ensembl Metazoa 27                              | SRP014559                                                                                                         | Lophotrochozoa                  | Metazoa    | Holozoa       | Opisthokonta | Amorphea       |
| <i>Capitella teleta</i>                                 | Ctel    | Ensembl Metazoa 27                              | SRP102138                                                                                                         | Lophotrochozoa                  | Metazoa    | Holozoa       | Opisthokonta | Amorphea       |
| <i>Schistosoma mansoni</i>                              | Sman    | Ensembl Metazoa 27                              | ERP000427                                                                                                         | Lophotrochozoa                  | Metazoa    | Holozoa       | Opisthokonta | Amorphea       |
| <i>Trichoplax adhaerens</i>                             | Tadh    | Ensembl Metazoa 27                              | <b>This study – PRJEB23829</b>                                                                                    | Placozoa                        | Metazoa    | Holozoa       | Opisthokonta | Amorphea       |
| <i>Hydra magnipapillata</i>                             | Hmag    | NCBI PRJNA12876                                 | SRP051110                                                                                                         | Cnidaria                        | Metazoa    | Holozoa       | Opisthokonta | Amorphea       |
| <i>Nematostella vectensis</i>                           | Nvec    | Ensembl Metazoa 27                              | SRP021895 / Schwaiger 2014<br>SRP018739 / Helm 2013                                                               | Cnidaria                        | Metazoa    | Holozoa       | Opisthokonta | Amorphea       |
| <i>Aiptasia</i> sp.                                     | Aipt    | (Baumgarten et al. 2015)                        | SRP047443                                                                                                         | Cnidaria                        | Metazoa    | Holozoa       | Opisthokonta | Amorphea       |
| <i>Mnemiopsis leidyi</i>                                | Mlei    | Ensembl Metazoa 27                              | SRP014828                                                                                                         | Ctenophora                      | Metazoa    | Holozoa       | Opisthokonta | Amorphea       |
| <i>Amphimedon queenslandica</i>                         | Aque    | Ensembl Metazoa 27                              | SRR1511618                                                                                                        | Porifera                        | Metazoa    | Holozoa       | Opisthokonta | Amorphea       |
| <i>Oscarella carmela</i>                                | Ocar    | (Nichols et al. 2012)                           | SRR1042012                                                                                                        | Porifera                        | Metazoa    | Holozoa       | Opisthokonta | Amorphea       |
| <i>Sycon ciliatum</i>                                   | Scil    | (Fortunato et al. 2014)                         | ERP005418                                                                                                         | Porifera                        | Metazoa    | Holozoa       | Opisthokonta | Amorphea       |
| <i>Salpingoeca rosetta</i>                              | Sros    | Ensembl Protist 27                              | SRP005692                                                                                                         | Choanoflagellata                | Metazoa    | Holozoa       | Opisthokonta | Amorphea       |
| <i>Capssapora owczarzakii</i>                           | Cowc    | (Suga et al. 2013)                              | SRP022579 / Sebé-Pedrós et al. 2013                                                                               | Filisterea                      | Metazoa    | Holozoa       | Opisthokonta | Amorphea       |
| <i>Creolimax fragrantissima</i>                         | Cfra    | (de Mendoza et al. 2015)                        | SRP058061 / de Mendoza et al. 2015                                                                                | Ichthyosporaea (Ichthyophonida) | Metazoa    | Holozoa       | Opisthokonta | Amorphea       |
| <i>Sphaerofarma arctica</i>                             | Sar3    | Broad Institute Multicellularity Initiative     | <b>This study – PRJEB23831</b>                                                                                    | Ichthyosporaea (Ichthyophonida) | Metazoa    | Holozoa       | Opisthokonta | Amorphea       |
| <i>Chromosphaera perkinsii</i>                          | Cper    | (Grau-Bové et al. 2017)                         | SRP097609                                                                                                         | Ichthyosporaea (Dermocystida)   | Metazoa    | Holozoa       | Opisthokonta | Amorphea       |
| <i>Neurospora crassa</i>                                | Ncrx    | Ensembl Fungi 27                                | SRP016065                                                                                                         | Fungi                           | Holomycota |               | Opisthokonta | Amorphea       |
| <i>Schizosaccharomyces pombe</i>                        | Spom    | Ensembl Fungi 27                                | ERP001483                                                                                                         | Fungi                           | Holomycota |               | Opisthokonta | Amorphea       |
| <i>Aspergillus oryzae</i>                               | Aory    | Ensembl Fungi 27                                | SRP016952                                                                                                         | Fungi                           | Holomycota |               | Opisthokonta | Amorphea       |
| <i>Cryptococcus neoformans</i>                          | Cneo    | Broad Institute Fungi Initiative                | SRR847297                                                                                                         | Fungi                           | Holomycota |               | Opisthokonta | Amorphea       |
| <i>Ustilago maydis</i>                                  | Umay    | Ensembl Fungi 27                                | ERP001905                                                                                                         | Fungi                           | Holomycota |               | Opisthokonta | Amorphea       |
| <i>Tuber melanosporum</i>                               | Tmel    | Ensembl Fungi 27                                | SRP028655                                                                                                         | Fungi                           | Holomycota |               | Opisthokonta | Amorphea       |
| <i>Rhizopus oryzae</i>                                  | Rory    | Broad Institute Fungi Initiative                | SRP031602                                                                                                         | Fungi                           | Holomycota |               | Opisthokonta | Amorphea       |
| <i>Allomyces macrogynus</i>                             | Amac    | Broad Institute Fungi Initiative                | SRP022576                                                                                                         | Fungi                           | Holomycota |               | Opisthokonta | Amorphea       |
| <i>Spizellomyces punctatus</i>                          | Spun    | Broad Institute Multicellularity Initiative     | SRR343043                                                                                                         | Fungi                           | Holomycota |               | Opisthokonta | Amorphea       |
| <i>Rhizophagus irregularis</i>                          | Rirr    | Ensembl Fungi 27                                | DRP002784                                                                                                         | Fungi                           | Holomycota |               | Opisthokonta | Amorphea       |
| <i>Conidiobolus coronatus</i>                           | Ccor    | JGI v1                                          | SRR427173                                                                                                         | Fungi                           | Holomycota |               | Opisthokonta | Amorphea       |
| <i>Gonapodya prolifera</i>                              | Gpro    | JGI v3                                          | SRR427152                                                                                                         | Fungi                           | Holomycota |               | Opisthokonta | Amorphea       |
| <i>Fonticula alba</i>                                   | Falb    | Broad Institute Multicellularity Initiative     | SRP022580                                                                                                         | Nucleariida                     | Holomycota |               | Opisthokonta | Amorphea       |
| <i>Dictyostelium discoideum</i> AX4                     | Ddis2   | Ensembl Protist 27 / Dictybase                  | SRP060392                                                                                                         | Amoebozoa                       |            |               |              | Amorphea       |
| <i>Polysphondylium pallidum</i>                         | Ppal    | Ensembl Protist 27                              | SRP004023                                                                                                         | Amoebozoa                       |            |               |              | Amorphea       |
| <i>Acanthamoeba castellanii</i>                         | Acas    | Ensembl Protist 27                              | SRP028620                                                                                                         | Amoebozoa                       |            |               |              | Amorphea       |
| <i>Arabidopsis thaliana</i>                             | Atha    | Ensembl Plants 27                               | SRP052658 / Max Planck MPP 2015 (full nutrition samples only)<br>SRP074840 / Hsu 2016                             | Embryophyta                     |            | Viridiplantae |              | Diaphorotickes |
| <i>Vitis vinifera</i>                                   | Vvin    | Ensembl Plants 27                               | SRP065417                                                                                                         | Embryophyta                     |            | Viridiplantae |              | Diaphorotickes |
| <i>Mimulus guttatus</i>                                 | Mgut    | JGI GCF_000504015                               | SRP045683                                                                                                         | Embryophyta                     |            | Viridiplantae |              | Diaphorotickes |
| <i>Oryza sativa</i>                                     | Osat2   | Ensembl Plants 27                               | DRP000315                                                                                                         | Embryophyta                     |            | Viridiplantae |              | Diaphorotickes |
| <i>Physcomitrella patens</i>                            | Ppat    | Ensembl Plants 27                               | SRP011279                                                                                                         | Embryophyta                     |            | Viridiplantae |              | Diaphorotickes |
| <i>Selaginella moellendorffii</i>                       | Smoe    | Ensembl Plants 27                               | SRP059539                                                                                                         | Embryophyta                     |            | Viridiplantae |              | Diaphorotickes |
| <i>Klebsormidium netis</i> (formerly <i>flaccidum</i> ) | Kfla    | (Hori et al. 2014)                              | SRP048567                                                                                                         | Charophyta                      |            | Viridiplantae |              | Diaphorotickes |
| <i>Volvox carterii</i>                                  | Vcar    | JGI 317_v2                                      | SRP066714                                                                                                         | Chlorophyta                     |            | Viridiplantae |              | Diaphorotickes |
| <i>Chlorella variabilis</i>                             | Cvar    | JGI NC64A - 2014-08-18                          | <b>NOT ANALYSED</b>                                                                                               | Chlorophyta                     |            | Viridiplantae |              | Diaphorotickes |
| <i>Chlamydomonas reinhardtii</i>                        | Crei    | Ensembl Plants 27                               | ERP001997                                                                                                         | Chlorophyta                     |            | Viridiplantae |              | Diaphorotickes |
| <i>Micromonas pusilla</i>                               | Mpus    | JGI 20110615                                    | SRR847305                                                                                                         | Chlorophyta                     |            | Viridiplantae |              | Diaphorotickes |
| <i>Cyanophora paradoxa</i>                              | Cpar    | Assembly (Price et al. 2012) annotation in-home | SRR363339                                                                                                         | Glaucochyta                     |            | Viridiplantae |              | Diaphorotickes |
| <i>Ectocarpus siliculosus</i>                           | Esil    | (Cock et al. 2010)                              | SRP037532                                                                                                         | Stramenopile                    |            | SAR+H         |              | Diaphorotickes |
| <i>Phytophthora infestans</i>                           | Pinf    | Ensembl Protist 27                              | SRR1640225                                                                                                        | Stramenopile                    |            | SAR+H         |              | Diaphorotickes |
| <i>Aureococcus anophagefferens</i>                      | Aano    | Ensembl Protist 27                              | SRP045642                                                                                                         | Stramenopile                    |            | SAR+H         |              | Diaphorotickes |
| <i>Plasmodium falciparum</i> 3D7                        | Pfal2   | Ensembl Protist 27                              | SRP069075                                                                                                         | Alveolata                       |            | SAR+H         |              | Diaphorotickes |
| <i>Tetrahymena thermophila</i>                          | Tthe    | Ensembl Protist 27                              | SRP016619                                                                                                         | Alveolata                       |            | SAR+H         |              | Diaphorotickes |
| <i>Bigelowiella natans</i> CCMP2755                     | BnatMEA | Ensembl Protist 27                              | MMETSP / SRP042159 (Bnat samples only)<br>SeqBioproject PRJNA47111 / Curtis et al 2012<br>DRP003230 / Suzuki 2016 | Rhizaria                        |            | SAR+H         |              | Diaphorotickes |
| <i>Emiliania huxleyi</i>                                | Ehux    | Ensembl Protist 27                              | SRR847300                                                                                                         | Haptophyta                      |            | SAR+H         |              | Diaphorotickes |
| <i>Guillardia theta</i>                                 | Gthe    | Ensembl Protist 27                              | SRR747855                                                                                                         | Cryptophyta                     |            |               |              | Diaphorotickes |
| <i>Naegleria gruberi</i>                                | Ngru    | Ensembl Protist 27                              | <b>This study – PRJEB23822</b>                                                                                    | Excavata                        |            |               |              | see note       |

Note: Unikonta is a deprecated name that included all amorphean species here included  
Note: Bikonta is a deprecated name that included all Diaphorotickes species here included EXCEPT for the Excavate *Naegleria gruberi*  
Species with replicates in blue

**Fig S1.** Summary of the eukaryotic species used in this study, including its a 4-letter abbreviation, the source of genome assemblies, GFF annotations, and RNA-seq experiments. Dataset accession numbers from SRA unless otherwise stated.

| Spe  | Introns_per_Alnpct |      | Introns_per_gene |           | GCC       | Nl_gname   | Nv_gname  | Nl_gname  | Nv_gname  | Ql_gname  | Qv_gname | Nl_transcript | Nv_transcript | Ql_transcript | Qv_transcript | Nl_exon    | Nv_exon  | Ql_exon  | Qv_exon | Nl_intron | Nv_intron  | Ql_intron  | Qv_intron | Nl_intronic | Nv_intronic | Ql_intronic | Qv_intronic |           |            |            |           |           |            |
|------|--------------------|------|------------------|-----------|-----------|------------|-----------|-----------|-----------|-----------|----------|---------------|---------------|---------------|---------------|------------|----------|----------|---------|-----------|------------|------------|-----------|-------------|-------------|-------------|-------------|-----------|------------|------------|-----------|-----------|------------|
|      | q1                 | q3   | q1               | q3        |           |            |           |           |           |           |          |               |               |               |               |            |          |          |         |           |            |            |           |             |             |             |             |           |            |            |           |           |            |
| Hhap | 4.86               | 8.40 | 0.40             | 20.346.00 | 49.576.62 | 108.719.49 | 4.364.04  | 16.412.50 | 48.399.25 | 20.346.00 | 1.680.98 | 1.808.68      | 760.00        | 1.253.00      | 2.021.75      | 198.096.00 | 172.68   | 292.53   | 86.00   | 123.00    | 171.00     | 170.876.00 | 5.335.75  | 18.061.04   | 490.00      | 1.493.00    | 3.888.00    | 20.306.00 | 86.896.29  | 375.804.21 | 5.551.25  | 20.204.00 | 65.875.00  |
| Hsus | 4.74               | 7.71 | 0.40             | 22.622.00 | 49.639.07 | 12.434.00  | 10.889.00 | 32.627.00 | 22.633.00 | 1.567.07  | 1.957.04 | 708.00        | 1.129.00      | 1.896.00      | 198.777.00    | 177.64     | 274.62   | 89.00    | 129.00  | 173.00    | 173.785.00 | 4.364.75   | 15.904.11 | 443.00      | 1.279.00    | 3.102.00    | 22.492.00   | 81.306.72 | 254.072.79 | 6.348.75   | 18.901.50 | 54.922.25 |            |
| Mdom | 4.63               | 7.74 | 0.40             | 21.327.00 | 51.246.38 | 100.271.47 | 2.352.50  | 15.435.00 | 53.702.50 | 21.327.00 | 1.577.76 | 1.507.03      | 777.00        | 1.158.00      | 1.895.00      | 187.581.00 | 179.38   | 264.22   | 86.00   | 124.00    | 174.00     | 164.984.00 | 5.960.23  | 16.152.71   | 532.00      | 1.633.00    | 4.476.00    | 21.316.00 | 117.400.00 | 280.182.60 | 10.624.00 | 35.061.50 | 104.131.00 |
| Oma  | 5.70               | 6.58 | 0.46             | 21.698.00 | 20.127.15 | 41.448.09  | 2.095.25  | 12.656.00 | 18.924.50 | 21.698.00 | 1.133.76 | 1.202.28      | 441.00        | 815.00        | 1.374.00      | 165.174.00 | 148.94   | 193.51   | 75.00   | 117.00    | 166.00     | 142.860.00 | 2.758.12  | 7.162.71    | 377.00      | 1.036.00    | 2.380.00    | 10.705.00 | 68.391.55  | 176.033.30 | 6.282.00  | 17.277.00 | 56.273.00  |
| Sfa  | 5.74               | 9.45 | 0.42             | 15.508.00 | 25.223.35 | 48.351.56  | 3.018.75  | 9.050.00  | 25.064.25 | 15.508.00 | 1.057.19 | 1.728.97      | 734.75        | 1.222.00      | 2.022.00      | 162.527.00 | 158.13   | 214.92   | 84.00   | 122.00    | 168.00     | 146.625.00 | 2.411.86  | 7.494.01    | 326.00      | 765.00      | 1.741.00    | 14.699.00 | 41.975.95  | 117.841.59 | 3.351.00  | 9.159.00  | 29.724.50  |
| Wcax | 4.41               | 9.38 | 0.40             | 17.785.00 | 37.879.18 | 12.078.09  | 1.968.00  | 4.776.50  | 12.638.00 | 17.785.00 | 1.579.71 | 1.794.99      | 673.00        | 1.213.00      | 1.862.00      | 191.723.00 | 155.64   | 211.76   | 75.00   | 117.00    | 167.00     | 172.028.00 | 1.990.27  | 4.840.28    | 296.00      | 813.00      | 1.788.00    | 16.275.00 | 46.457.13  | 93.861.43  | 1.743.00  | 16.212.00 | 47.381.00  |
| Drex | 5.25               | 8.20 | 0.36             | 26.459.00 | 24.095.14 | 42.961.53  | 3.835.00  | 10.421.00 | 25.126.00 | 26.459.00 | 1.593.47 | 1.656.86      | 752.00        | 1.180.00      | 1.912.00      | 245.365.00 | 171.83   | 266.71   | 83.00   | 122.00    | 173.00     | 217.089.00 | 2.628.71  | 7.494.20    | 135.00      | 963.00      | 2.528.00    | 26.001.00 | 28.438.17  | 6.672.31   | 3.946.00  | 9.259.00  | 25.814.00  |
| Cint | 5.13               | 5.37 | 0.36             | 16.671.00 | 3.458.44  | 4.448.11   | 975.00    | 2.133.00  | 4.312.00  | 16.671.00 | 0.953.00 | 1.036.57      | 427.50        | 703.00        | 1.236.00      | 107.347.00 | 148.98   | 160.87   | 88.00   | 127.00    | 162.00     | 89.508.00  | 434.76    | 619.23      | 322.00      | 322.00      | 480.00      | 15.938.00 | 5.938.26   | 5.169.30   | 758.00    | 1.776.00  | 3.935.50   |
| Q06  | 4.06               | 6.01 | 0.41             | 50.817.00 | 9.116.95  | 12.701.34  | 1.900.00  | 4.932.00  | 10.995.00 | 50.817.00 | 1.424.26 | 1.517.25      | 593.00        | 1.026.00      | 1.725.00      | 356.631.00 | 202.95   | 294.13   | 95.00   | 136.00    | 194.00     | 305.567.00 | 1.275.04  | 2.744.69    | 339.00      | 531.00      | 1.030.00    | 48.842.00 | 8.420.33   | 14.514.58  | 1.620.00  | 3.756.00  | 8.842.50   |
| Q07  | 4.48               | 6.18 | 0.34             | 26.089.00 | 8.068.40  | 9.281.77   | 1.700.50  | 5.047.00  | 11.114.00 | 26.089.00 | 1.334.78 | 1.510.57      | 412.00        | 943.00        | 1.467.00      | 265.004.00 | 179.56   | 241.76   | 75.00   | 117.00    | 185.00     | 163.901.00 | 1.080.49  | 1.851.91    | 208.00      | 403.00      | 1.058.00    | 22.775.00 | 11.369.58  | 17.951.16  | 1.845.00  | 5.042.00  | 17.381.00  |
| Q08  | 3.73               | 4.33 | 0.40             | 30.375.00 | 2.651.28  | 3.203.57   | 814.00    | 1.632.00  | 3.368.50  | 31.375.00 | 1.050.68 | 1.068.88      | 484.00        | 806.00        | 1.284.00      | 171.418.00 | 199.09   | 251.17   | 89.00   | 134.00    | 204.00     | 139.288.00 | 369.66    | 1.037.20    | 52.00       | 60.00       | 256.00      | 25.094.00 | 6.208.96   | 7.986.67   | 1.509.00  | 3.957.00  | 7.270.00   |
| Sman | 3.85               | 5.34 | 0.35             | 10.772.00 | 14.644.48 | 19.071.54  | 1.505.00  | 2.870.00  | 20.163.00 | 10.772.00 | 1.430.76 | 1.620.16      | 475.00        | 971.00        | 1.828.00      | 68.476.00  | 225.07   | 286.29   | 95.00   | 159.00    | 266.00     | 57.502.00  | 2.423.04  | 3.276.50    | 646.00      | 1.576.00    | 2.901.00    | 10.353.00 | 18.611.24  | 25.216.00  | 4.871.00  | 11.536.00 | 22.934.00  |
| Tadh | 5.48               | 7.41 | 0.33             | 11.520.00 | 3.460.18  | 3.349.96   | 1.388.00  | 2.627.00  | 8.620.00  | 11.520.00 | 1.350.78 | 1.273.52      | 647.00        | 1.028.00      | 1.605.00      | 96.959.00  | 120.49   | 288.43   | 70.00   | 101.00    | 153.00     | 85.416.00  | 281.92    | 667.75      | 93.00       | 133.00      | 256.00      | 10.952.00 | 5.438.46   | 13.402.13  | 1.486.00  | 2.804.00  | 5.602.25   |
| Hmgs | 3.61               | 5.17 | 0.28             | 20.947.00 | 15.036.94 | 18.415.39  | 1.457.00  | 7.656.00  | 22.497.50 | 20.947.00 | 1.406.59 | 1.212.84      | 704.00        | 1.092.00      | 1.696.00      | 140.041.00 | 227.53   | 322.14   | 80.00   | 129.00    | 231.00     | 103.671.00 | 6.210.53  | 4.110.70    | 146.00      | 667.00      | 3.473.00    | 11.102.00 | 13.924.14  | 15.882.14  | 2.784.00  | 9.829.50  | 19.896.00  |
| Nvex | 3.77               | 4.31 | 0.41             | 24.723.00 | 4.444.29  | 6.046.06   | 736.00    | 2.300.00  | 5.872.00  | 24.723.00 | 998.89   | 987.34        | 431.00        | 750.00        | 1.215.00      | 131.666.00 | 187.84   | 248.78   | 72.00   | 117.00    | 198.00     | 108.828.00 | 785.90    | 1.466.68    | 231.00      | 436.00      | 818.00      | 20.875.00 | 7.665.90   | 10.212.96  | 1.602.00  | 4.107.00  | 9.412.50   |
| Ajpt | 3.80               | 5.02 | 0.36             | 29.271.00 | 5.548.84  | 6.546.66   | 1.644.50  | 3.463.00  | 6.960.50  | 29.271.00 | 1.543.98 | 1.662.30      | 638.00        | 1.102.00      | 1.820.00      | 212.739.00 | 212.44   | 388.36   | 82.00   | 116.00    | 207.00     | 146.958.00 | 1.210.73  | 2.062.29    | 116.00      | 283.00      | 558.00      | 25.895.00 | 7.339.09   | 875.00     | 2.269.00  | 4.820.50  |            |
| Mlei | 3.26               | 4.46 | 0.39             | 16.058.00 | 5.381.68  | 7.110.61   | 1.058.25  | 2.450.00  | 16.058.00 | 1.377.51  | 1.225.39 | 621.00        | 1.049.00      | 1.688.00      | 88.550.00     | 249.80     | 414.55   | 101.00   | 138.00  | 198.00    | 71.632.00  | 803.79     | 1.548.92  | 172.00      | 271.00      | 207.00      | 14.367.00   | 3.327.87  | 6.798.16   | 793.00     | 2.020.00  | 4.992.00  |            |
| Aque | 3.80               | 4.05 | 0.36             | 40.122.00 | 2.384.84  | 4.478.39   | 477.00    | 1.080.00  | 2.441.00  | 40.122.00 | 1.054.25 | 1.300.55      | 352.00        | 662.00        | 1.284.00      | 204.935.00 | 206.40   | 353.89   | 78.00   | 122.00    | 206.00     | 162.577.00 | 248.86    | 708.53      | 49.00       | 67.00       | 702.00      | 30.899.00 | 1.441.49   | 5.263.45   | 174.00    | 501.00    | 1.967.50   |
| Ccar | 4.01               | 0.98 | 0.40             | 8.694.00  | 3.581.62  | 3.335.94   | 1.497.25  | 2.614.00  | 4.552.75  | 8.694.00  | 1.570.28 | 1.365.71      | 744.00        | 1.215.00      | 1.935.00      | 65.960.00  | 208.97   | 307.77   | 94.00   | 134.00    | 195.00     | 57.245.00  | 303.35    | 171.91      | 178.00      | 297.00      | 387.00      | 8.942.00  | 1.953.37   | 1.436.29   | 735.25    | 1.213.00  | 2.009.00   |
| Scil | 2.76               | 4.22 | 0.47             | 26.105.00 | 6.459.26  | 9.220.71   | 635.00    | 2.596.00  | 8.744.00  | 26.105.00 | 1.247.78 | 1.611.41      | 443.00        | 914.00        | 1.590.00      | 140.348.00 | 237.11   | 444.73   | 80.00   | 125.00    | 219.00     | 110.121.00 | 1.074.71  | 1.538.08    | 378.00      | 642.00      | 1.201.00    | 22.679.00 | 4.655.72   | 9.653.28   | 833.00    | 3.070.00  | 7.874.00   |
| Sros | 4.73               | 7.44 | 0.56             | 11.624.00 | 3.872.65  | 3.467.72   | 1.653.75  | 2.876.50  | 4.909.00  | 11.624.00 | 1.987.00 | 2.149.36      | 819.00        | 1.400.00      | 2.418.00      | 98.139.00  | 235.35   | 552.61   | 70.00   | 108.00    | 178.00     | 86.511.00  | 251.35    | 324.28      | 178.00      | 222.00      | 274.00      | 11.474.00 | 863.93     | 1.378.55   | 3.222.00  | 5.400.00  | 8.511.00   |
| Cowc | 2.41               | 3.47 | 0.54             | 8.741.00  | 2.457.38  | 1.841.11   | 1.276.00  | 2.042.00  | 3.138.00  | 8.741.00  | 1.951.30 | 1.755.08      | 871.00        | 1.493.00      | 2.492.00      | 42.674.00  | 399.69   | 775.58   | 88.00   | 156.00    | 357.00     | 30.361.00  | 120.21    | 272.25      | 82.00       | 100.00      | 132.00      | 8.665.00  | 2.447.03   | 5.238.65   | 229.50    | 598.00    | 3.952.00   |
| Sar3 | 3.22               | 4.86 | 0.38             | 16.015.00 | 4.258.88  | 5.879.84   | 894.50    | 2.075.00  | 5.222.00  | 16.015.00 | 1.468.33 | 1.409.67      | 566.00        | 1.068.00      | 1.909.00      | 92.075.00  | 250.53   | 452.04   | 88.00   | 138.00    | 220.00     | 77.911.00  | 571.41    | 858.70      | 133.00      | 376.00      | 743.00      | 13.322.51 | 4.411.29   | 4.956.00   | 1.821.00  | 4.503.50  |            |
| Nk52 | 0.59               | 0.63 | 0.43             | 12.463.00 | 1.724.22  | 1.642.00   | 731.50    | 1.322.00  | 12.463.00 | 1.628.03  | 1.627.01 | 656.00        | 1.286.00      | 2.006.00      | 20.267.00     | 999.91     | 1.324.24 | 208.00   | 537.00  | 1.352.00  | 7.804.00   | 154.81     | 314.27    | 85.00       | 99.00       | 121.00      | 9.806.00    | 1.066.58  | 1.213.54   | 277.00     | 614.00    | 1.620.00  |            |
| Ncrr | 2.10               | 1.74 | 0.48             | 9.820.00  | 1.694.61  | 2.182.95   | 895.50    | 1.422.50  | 2.142.25  | 9.820.00  | 1.456.12 | 1.198.03      | 664.00        | 1.208.50      | 1.868.25      | 26.267.00  | 531.05   | 746.81   | 91.00   | 239.00    | 691.00     | 17.104.00  | 134.92    | 123.73      | 64.00       | 83.00       | 150.00      | 9.699.00  | 2.007.41   | 2.817.63   | 797.00    | 1.350.00  | 2.339.00   |
| Cncr | 1.24               | 1.36 | 0.56             | 5.144.00  | 1.474.80  | 1.113.16   | 765.00    | 1.216.00  | 1.843.25  | 5.144.00  | 1.392.25 | 1.114.38      | 667.75        | 1.133.00      | 1.750.00      | 10.210.00  | 701.44   | 963.11   | 105.00  | 306.00    | 986.00     | 5.060.00   | 80.82     | 71.34       | 45.00       | 54.00       | 84.00       | 5.138.00  | 966.50     | 1.676.75   | 385.00    | 681.00    | 1.154.00   |
| Acry | 1.83               | 1.93 | 0.48             | 12.074.00 | 1.574.64  | 1.143.95   | 830.00    | 1.301.50  | 1.920.75  | 12.074.00 | 1.343.44 | 1.039.10      | 709.00        | 1.112.00      | 1.633.75      | 35.404.00  | 458.16   | 633.20   | 103.00  | 249.00    | 574.00     | 25.330.00  | 117.66    | 223.23      | 53.00       | 61.00       | 82.00       | 12.063.00 | 1.567.04   | 3.158.09   | 493.50    | 939.00    | 1.870.00   |
| Cneo | 4.18               | 5.25 | 0.48             | 6.962.00  | 1.901.06  | 1.265.25   | 1.039.25  | 1.613.00  | 2.392.75  | 6.962.00  | 1.562.49 | 1.143.37      | 794.00        | 1.299.00      | 1.991.00      | 43.483.00  | 252.55   | 738.00   | 144.00  | 248.00    | 361.518.00 | 62.54      | 43.80     | 50.00       | 54.00       | 62.00       | 6.948.00    | 806.75    | 1.897.31   | 960.79     | 488.00    | 906.25    |            |
| Urmy | 0.76               | 0.75 | 0.54             | 6.522.00  | 1.931.39  | 1.386.88   | 996.00    | 1.574.00  | 2.473.00  | 6.522.00  | 1.835.27 | 1.362.25      | 890.00        | 1.502.00      | 2.378.00      | 11.420.00  | 1.048.13 | 1.239.99 | 149.00  | 567.00    | 1.574.00   | 4.896.00   | 128.00    | 109.88      | 62.00       | 94.00       | 144.25      | 6.258.00  | 994.33     | 960.89     | 388.00    | 713.00    | 1.270.75   |
| Uryy | 2.84               | 2.87 | 0.45             |           |           |            |           |           |           |           |          |               |               |               |               |            |          |          |         |           |            |            |           |             |             |             |             |           |            |            |           |           |            |

### A) Construction of ES catalog, and ES event calling:

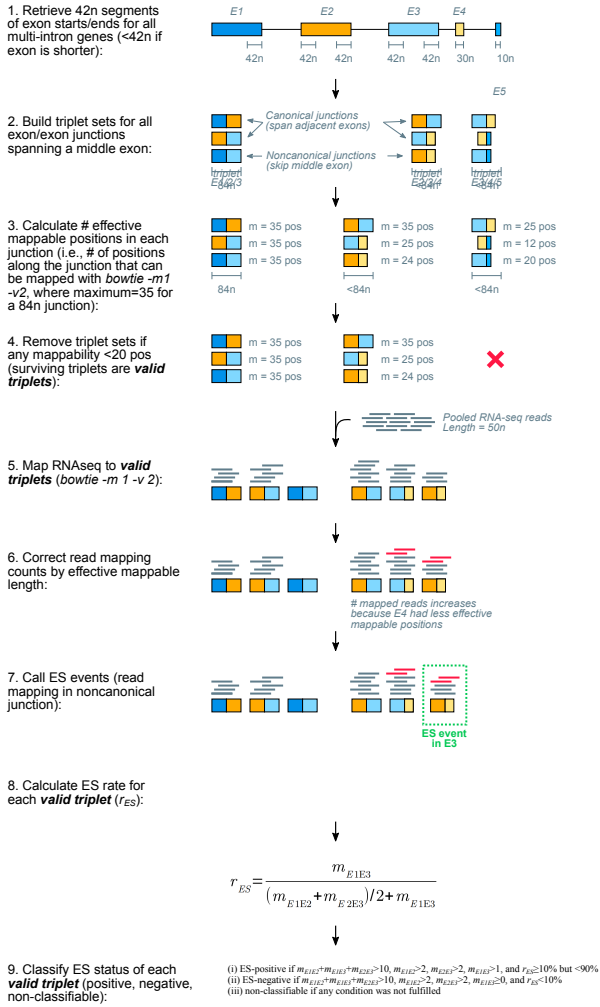

### B) Construction of IR events catalog, and IR event calling:

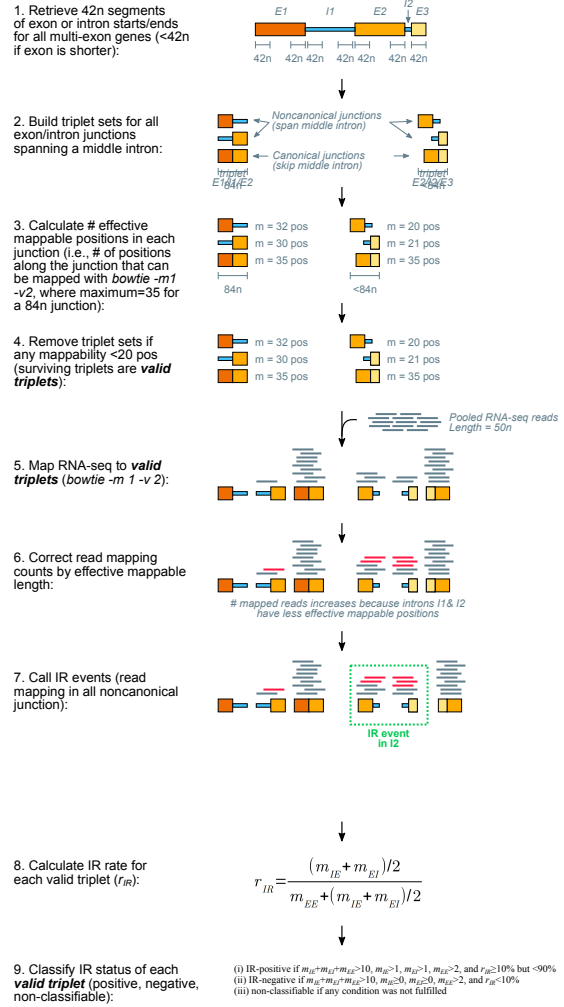

### C) Quantification procedure (valid for ES and IR):

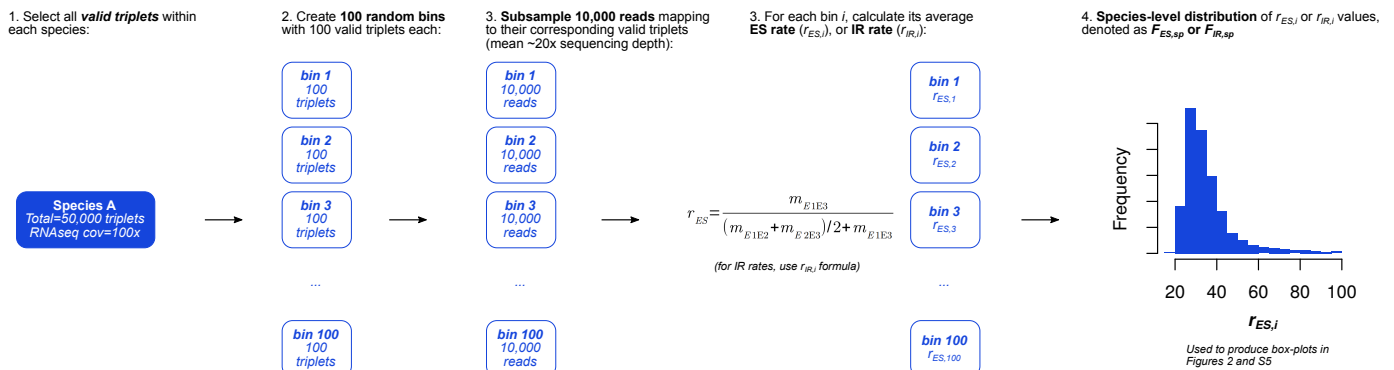

**Fig S3.** Methods overview.

A-B) Summary of the methodology employed to detect ES (A) and IR events (B), including junction construction, mappability correction and filtering, RNA-seq mapping, AS event calling, and frequency calculations.

C) Quantification procedure followed to analyse ES and IR frequencies at the species level, using valid triplets.

| Sps     | num total genes | num total introns | num positive genes ES | num positive tripl ES | num negative genes ES | num negative tripl ES | num positive genes IR | num positive tripl IR | num negative genes IR | num negative tripl IR | % positive genes ES | % positive tripl ES | % positive genes IR | % positive tripl IR |
|---------|-----------------|-------------------|-----------------------|-----------------------|-----------------------|-----------------------|-----------------------|-----------------------|-----------------------|-----------------------|---------------------|---------------------|---------------------|---------------------|
| Hsap    | 20,346          | 177,720           | 2,144                 | 2,559                 | 10,463                | 87,405                | 2,182                 | 4,519                 | 5,480                 | 39,978                | 10.538              | 1.440               | 10.724              | 2.543               |
| Hsax    | 20,346          | 177,720           | 2,299                 | 2,733                 | 12,390                | 104,580               | 5,682                 | 17,646                | 6,542                 | 37,045                | 11.300              | 1.538               | 27.927              | 9.929               |
| Mmus    | 22,533          | 176,244           | 1,693                 | 1,978                 | 13,452                | 121,566               | 3,321                 | 6,570                 | 7,493                 | 61,161                | 7.513               | 1.122               | 14.738              | 3.728               |
| Mmum    | 22,533          | 176,244           | 1,167                 | 1,315                 | 11,707                | 97,783                | 1,430                 | 2,188                 | 6,852                 | 50,228                | 5.179               | 0.746               | 6.346               | 1.241               |
| Mdom    | 21,327          | 166,254           | 1,502                 | 1,786                 | 12,062                | 98,246                | 1,778                 | 2,974                 | 6,519                 | 50,004                | 7.043               | 1.074               | 8.337               | 1.789               |
| Oana    | 21,698          | 143,476           | 922                   | 1,015                 | 11,538                | 64,925                | 389                   | 456                   | 7,253                 | 37,296                | 4.249               | 0.707               | 1.793               | 0.318               |
| Ggal    | 15,508          | 147,019           | 1,029                 | 1,195                 | 10,828                | 90,527                | 1,923                 | 3,156                 | 5,708                 | 43,245                | 6.635               | 0.813               | 12.400              | 2.147               |
| Xtro    | 18,442          | 173,281           | 595                   | 652                   | 11,763                | 83,821                | 534                   | 636                   | 6,519                 | 47,559                | 3.226               | 0.376               | 2.896               | 0.367               |
| Xtrx    | 18,442          | 173,281           | 431                   | 471                   | 10,886                | 72,310                | 981                   | 1,303                 | 6,255                 | 37,597                | 2.337               | 0.272               | 5.319               | 0.752               |
| Drex    | 26,459          | 218,906           | 1,370                 | 1,554                 | 17,505                | 138,745               | 1,608                 | 2,056                 | 10,223                | 74,712                | 5.178               | 0.710               | 6.077               | 0.939               |
| Drer    | 26,459          | 218,906           | 701                   | 774                   | 15,964                | 124,743               | 595                   | 712                   | 8,642                 | 64,939                | 2.649               | 0.354               | 2.249               | 0.325               |
| Cint    | 16,671          | 90,676            | 592                   | 631                   | 6,997                 | 26,701                | 353                   | 406                   | 3,607                 | 13,358                | 3.551               | 0.696               | 2.117               | 0.448               |
| Brabel  | 30,392          | 234,612           | 1,279                 | 1,575                 | 16,211                | 123,136               | 1,935                 | 2,664                 | 10,087                | 72,485                | 4.208               | 0.671               | 6.367               | 1.135               |
| Spur2   | 28,842          | 167,677           | 1,541                 | 1,875                 | 8,863                 | 40,461                | 246                   | 299                   | 5,490                 | 25,598                | 5.343               | 1.189               | 0.853               | 0.190               |
| Dmel    | 13,917          | 41,189            | 342                   | 397                   | 6,658                 | 23,632                | 2,207                 | 4,198                 | 3,805                 | 12,403                | 2.457               | 0.964               | 15.858              | 10.192              |
| Dmel2   | 13,917          | 41,189            | 350                   | 402                   | 6,593                 | 22,604                | 616                   | 856                   | 4,305                 | 14,233                | 2.515               | 0.976               | 4.426               | 2.078               |
| Cele    | 20,447          | 104,192           | 557                   | 616                   | 13,732                | 63,476                | 6,517                 | 13,362                | 6,608                 | 29,035                | 2.724               | 0.591               | 31.873              | 12.824              |
| Cgig    | 26,089          | 160,801           | 552                   | 657                   | 11,548                | 79,503                | 743                   | 993                   | 7,055                 | 46,293                | 2.116               | 0.409               | 2.848               | 0.618               |
| Ctel    | 32,175          | 139,243           | 425                   | 482                   | 11,147                | 65,114                | 1,669                 | 2,193                 | 6,489                 | 35,746                | 1.321               | 0.346               | 5.187               | 1.575               |
| Sman    | 10,772          | 57,702            | 462                   | 490                   | 5,340                 | 26,280                | 718                   | 1,036                 | 2,987                 | 14,393                | 4.289               | 0.849               | 6.665               | 1.795               |
| Tadh    | 11,520          | 85,439            | 20                    | 20                    | 6,613                 | 43,359                | 402                   | 500                   | 3,494                 | 19,505                | 0.174               | 0.023               | 3.490               | 0.585               |
| Hmag    | 20,047          | 103,994           | 329                   | 341                   | 9,360                 | 54,471                | 204                   | 215                   | 5,698                 | 30,965                | 1.641               | 0.328               | 1.018               | 0.207               |
| Nvec    | 24,773          | 106,893           | 240                   | 250                   | 8,315                 | 49,134                | 1,288                 | 1,924                 | 4,643                 | 27,336                | 0.969               | 0.234               | 5.199               | 1.800               |
| Nvex    | 24,773          | 106,893           | 318                   | 335                   | 9,230                 | 53,440                | 1,229                 | 1,495                 | 5,976                 | 33,802                | 1.284               | 0.313               | 4.961               | 1.399               |
| Aipt    | 29,271          | 183,468           | 123                   | 124                   | 9,399                 | 54,748                | 883                   | 1,200                 | 5,273                 | 26,298                | 0.420               | 0.068               | 3.017               | 0.654               |
| Mlei    | 16,058          | 72,492            | 153                   | 165                   | 7,037                 | 33,668                | 118                   | 135                   | 3,843                 | 18,998                | 0.953               | 0.228               | 0.735               | 0.186               |
| Aque    | 40,122          | 164,813           | 101                   | 103                   | 9,914                 | 63,675                | 1,856                 | 2,827                 | 6,121                 | 32,300                | 0.252               | 0.062               | 4.626               | 1.715               |
| Ocar    | 11,152          | 62,573            | 12                    | 12                    | 5,571                 | 30,963                | 790                   | 1,084                 | 3,309                 | 17,622                | 0.108               | 0.019               | 7.084               | 1.732               |
| Scil    | 26,105          | 114,243           | 85                    | 85                    | 7,771                 | 47,151                | 523                   | 599                   | 3,839                 | 20,399                | 0.326               | 0.074               | 2.003               | 0.524               |
| Sros    | 11,624          | 86,515            | 8                     | 8                     | 6,852                 | 38,486                | 125                   | 127                   | 3,489                 | 15,726                | 0.069               | 0.009               | 1.075               | 0.147               |
| Cowc    | 8,741           | 32,468            | 9                     | 9                     | 4,357                 | 15,501                | 592                   | 804                   | 2,250                 | 7,923                 | 0.103               | 0.028               | 6.773               | 2.476               |
| Cfra    | 8,694           | 57,266            | 78                    | 79                    | 6,228                 | 41,670                | 1,327                 | 2,098                 | 3,282                 | 20,254                | 0.897               | 0.138               | 15.263              | 3.664               |
| Sar3    | 16,015          | 77,911            | 292                   | 317                   | 6,069                 | 37,679                | 291                   | 415                   | 3,492                 | 21,533                | 1.823               | 0.407               | 1.817               | 0.533               |
| Sarc4   | 33,969          | 74,290            | 322                   | 350                   | 7,147                 | 45,274                | 681                   | 910                   | 4,246                 | 26,269                | 0.948               | 0.471               | 2.005               | 1.225               |
| Nk52    | 12,463          | 7,804             | 5                     | 5                     | 1,619                 | 2,824                 | 517                   | 721                   | 1,392                 | 2,305                 | 0.040               | 0.064               | 4.148               | 9.239               |
| Ncra    | 9,820           | 17,106            | 5                     | 5                     | 2,445                 | 3,937                 | 378                   | 425                   | 2,526                 | 4,388                 | 0.051               | 0.029               | 3.849               | 2.485               |
| Spom    | 5,144           | 5,066             | 5                     | 5                     | 1,160                 | 2,230                 | 491                   | 693                   | 845                   | 1,421                 | 0.097               | 0.099               | 9.545               | 13.679              |
| Aory    | 12,074          | 23,330            | 0                     | 0                     | 3,356                 | 6,524                 | 370                   | 461                   | 2,523                 | 5,329                 | 0.000               | 0.000               | 3.064               | 1.976               |
| Cneo    | 6,962           | 36,521            | 6                     | 6                     | 3,694                 | 9,484                 | 394                   | 452                   | 2,225                 | 5,409                 | 0.086               | 0.016               | 5.659               | 1.238               |
| Umay    | 6,522           | 4,898             | 0                     | 0                     | 281                   | 407                   | 193                   | 227                   | 389                   | 530                   | 0.000               | 0.000               | 2.959               | 4.635               |
| Tmel    | 7,496           | 21,525            | 11                    | 11                    | 3,977                 | 10,458                | 1,013                 | 1,446                 | 2,532                 | 7,114                 | 0.147               | 0.051               | 13.514              | 6.718               |
| Rory    | 17,459          | 40,515            | 4                     | 4                     | 4,865                 | 11,891                | 826                   | 948                   | 3,468                 | 8,756                 | 0.023               | 0.010               | 4.731               | 2.340               |
| Amac    | 18,773          | 43,776            | 3                     | 3                     | 3,497                 | 5,938                 | 234                   | 245                   | 2,798                 | 4,950                 | 0.016               | 0.007               | 1.246               | 0.560               |
| Spun    | 8,952           | 43,038            | 3                     | 3                     | 4,605                 | 17,308                | 446                   | 537                   | 2,400                 | 7,261                 | 0.034               | 0.007               | 4.982               | 1.248               |
| Rirr    | 29,822          | 72,193            | 49                    | 49                    | 5,627                 | 21,892                | 715                   | 908                   | 3,411                 | 12,121                | 0.164               | 0.068               | 2.398               | 1.258               |
| Rirr2   | 29,822          | 72,193            | 4                     | 4                     | 1,765                 | 4,188                 | 38                    | 41                    | 703                   | 1,506                 | 0.013               | 0.006               | 0.127               | 0.057               |
| Ccor    | 10,635          | 18,544            | 1                     | 1                     | 2,401                 | 6,634                 | 34                    | 37                    | 1,519                 | 3,950                 | 0.009               | 0.005               | 0.320               | 0.200               |
| Gpro    | 13,902          | 61,811            | 4                     | 5                     | 7,501                 | 30,953                | 411                   | 484                   | 4,259                 | 17,948                | 0.029               | 0.008               | 2.956               | 0.783               |
| Falb    | 5,881           | 21,937            | 0                     | 0                     | 3,270                 | 9,950                 | 55                    | 57                    | 1,963                 | 5,445                 | 0.000               | 0.000               | 0.935               | 0.260               |
| Ddis2   | 13,212          | 16,788            | 5                     | 5                     | 2,496                 | 3,985                 | 32                    | 32                    | 2,580                 | 4,234                 | 0.038               | 0.030               | 0.242               | 0.191               |
| Ppal    | 12,367          | 33,347            | 0                     | 0                     | 3,651                 | 7,086                 | 86                    | 96                    | 2,871                 | 5,931                 | 0.000               | 0.000               | 0.695               | 0.288               |
| Acas    | 14,973          | 90,785            | 5                     | 5                     | 8,007                 | 40,958                | 22                    | 23                    | 4,546                 | 24,761                | 0.033               | 0.006               | 0.147               | 0.025               |
| Atha    | 27,416          | 113,157           | 118                   | 120                   | 13,995                | 76,060                | 2,567                 | 3,590                 | 8,243                 | 43,766                | 0.430               | 0.106               | 9.363               | 3.173               |
| Atha3   | 27,416          | 113,157           | 88                    | 91                    | 10,294                | 48,586                | 732                   | 848                   | 5,855                 | 24,626                | 0.321               | 0.080               | 2.670               | 0.749               |
| Vvin    | 29,927          | 112,194           | 338                   | 351                   | 10,345                | 56,299                | 1,529                 | 2,223                 | 5,877                 | 30,872                | 1.129               | 0.313               | 5.109               | 1.981               |
| Mgut    | 27,232          | 116,240           | 146                   | 150                   | 12,184                | 67,903                | 905                   | 1,089                 | 7,310                 | 39,298                | 0.536               | 0.129               | 3.323               | 0.937               |
| Osat2   | 35,679          | 99,011            | 70                    | 70                    | 9,147                 | 36,854                | 367                   | 393                   | 4,902                 | 15,525                | 0.196               | 0.071               | 1.029               | 0.397               |
| Ppat    | 32,273          | 117,531           | 385                   | 396                   | 10,800                | 56,093                | 2,022                 | 2,838                 | 5,697                 | 25,914                | 1.193               | 0.337               | 6.265               | 2.415               |
| Marpol  | 19,287          | 73,310            | 391                   | 423                   | 7,805                 | 50,721                | 1,386                 | 2,203                 | 4,564                 | 27,604                | 2.027               | 0.577               | 7.186               | 3.005               |
| Smoe    | 34,799          | 162,434           | 5                     | 5                     | 803                   | 1,574                 | 288                   | 354                   | 788                   | 1,164                 | 0.014               | 0.003               | 0.828               | 0.218               |
| Kfla    | 16,544          | 92,208            | 72                    | 76                    | 8,992                 | 48,544                | 967                   | 1,214                 | 5,130                 | 28,534                | 0.435               | 0.082               | 5.845               | 1.317               |
| Vcar    | 14,247          | 95,854            | 421                   | 445                   | 9,018                 | 52,947                | 2,905                 | 5,380                 | 4,888                 | 24,212                | 2.955               | 0.464               | 20.390              | 5.613               |
| Crei    | 14,416          | 104,675           | 48                    | 48                    | 8,764                 | 42,403                | 764                   | 1,001                 | 4,945                 | 25,836                | 0.333               | 0.046               | 5.300               | 0.956               |
| Mpus    | 9,886           | 10,959            | 13                    | 13                    | 878                   | 1,549                 | 367                   | 532                   | 678                   | 776                   | 0.131               | 0.119               | 3.712               | 4.854               |
| Cpar    | 11,011          | 60,591            | 3                     | 3                     | 1,411                 | 5,681                 | 42                    | 53                    | 731                   | 2,873                 | 0.027               | 0.005               | 0.381               | 0.087               |
| Gthe    | 24,945          | 132,687           | 14                    | 14                    | 11,695                | 63,250                | 2,082                 | 4,495                 | 6,453                 | 34,660                | 0.056               | 0.011               | 8.346               | 3.388               |
| GtheME  | 24,945          | 132,687           | 42                    | 44                    | 10,088                | 50,474                | 624                   | 1,044                 | 5,277                 | 24,479                | 0.168               | 0.033               | 2.502               | 0.787               |
| Esil    | 16,271          | 113,633           | 210                   | 223                   | 11,955                | 71,691                | 1,143                 | 1,547                 | 6,813                 | 41,978                | 1.291               | 0.196               | 7.025               | 1.361               |
| Pinf    | 17,785          | 31,359            | 6                     | 6                     | 2,563                 | 6,125                 | 604                   | 739                   | 1,835                 | 4,140                 | 0.034               | 0.019               | 3.396               | 2.357               |
| Aano    | 11,520          | 14,801            | 2                     | 2                     | 309                   | 684                   | 286                   | 473                   | 274                   | 393                   | 0.017               | 0.014               | 2.483               | 3.196               |
| Pfal2   | 5,349           | 8,417             | 22                    | 24                    | 1,450                 | 4,796                 | 773                   | 1,131                 | 988                   | 2,479                 | 0.411               | 0.285               | 14.451              | 13.437              |
| Tthe    | 24,725          | 89,334            | 48                    | 50                    | 7,841                 | 28,021                | 969                   | 1,309                 | 4,746                 | 17,065                | 0.194               | 0.056               | 3.919               | 1.465               |
| BnatMEA | 21,706          | 167,127           | 258                   | 291                   | 14,630                | 96,954                | 4,874                 | 8,715                 | 7,963                 | 49,635                | 1.189               | 0.174               | 22.455              | 5.215               |
| Bnat    | 21,706          | 167,127           | 114                   | 119                   | 9,994                 | 50,847                | 1,246                 | 2,076                 | 4,475                 | 19,884                | 0.525               | 0.071               | 5.740               | 1.242               |
| Bnao    | 21,706          | 167,127           | 501                   | 727                   | 8,456                 | 56,882                | 2,451                 | 5,623                 | 3,196                 | 10,859                | 2.308               | 0.435               | 11.292              | 3.365               |
| Ehux    | 38,544          | 96,189            | 5                     | 5                     | 969                   | 1,959                 | 262                   | 365                   | 581                   | 916                   | 0.013               | 0.005               | 0.680               | 0.379               |
| Ngru    | 15,709          | 10,688            | 3                     | 3                     | 1,332                 | 2,091                 | 113                   | 122                   | 1,537                 | 2,534                 | 0.019               | 0.028               | 0.719               | 1.141               |

**Fig S4.** Counts of ES and IR events per species, at the gene and exon/intron level.

| sp      | Median # reads ES | Median # genes ES | # bins ES | Median # reads IR | Median # genes IR | # bins IR |
|---------|-------------------|-------------------|-----------|-------------------|-------------------|-----------|
| Hsap    | 10000.0           | 99.0              | 100.0     | 10000             | 99.00             | 100       |
| Hsax    | 10000.0           | 99.0              | 100.0     | 10000             | 99                | 100       |
| Mmus    | 10000.0           | 99.0              | 100.0     | 10000             | 99                | 100       |
| Mmux    | 10000.0           | 99.0              | 100.0     | 10000             | 99                | 100       |
| Mdom    | 10000.0           | 100.0             | 100.0     | 10000             | 99                | 100       |
| Oana    | 10000.0           | 99.0              | 100.0     | 10000             | 99                | 100       |
| Ggal    | 10000.0           | 99.0              | 100.0     | 10000             | 99                | 100       |
| Xtro    | 10000.0           | 96.0              | 100.0     | 10000             | 99                | 100       |
| Xtrx    | 10000.0           | 99.0              | 100.0     | 10000             | 99                | 100       |
| Drex    | 10000.0           | 99.0              | 100.0     | 10000             | 99                | 100       |
| Drer    | 10000.0           | 96.5              | 100.0     | 10000             | 99                | 100       |
| Cint    | 10000.0           | 99.0              | 100.0     | 10000             | 99                | 100       |
| Brabel  | 10000.0           | 98.0              | 100.0     | 10000             | 99                | 100       |
| Spur2   | 10000.0           | 99.0              | 100.0     | 10000             | 98                | 100       |
| Dmel    | 10000.0           | 98.0              | 100.0     | 10000             | 98                | 100       |
| Dmel2   | 10000.0           | 99.0              | 100.0     | 10000             | 98                | 100       |
| Cele    | 10000.0           | 98.0              | 100.0     | 10000             | 99                | 100       |
| Cgig    | 10000.0           | 99.0              | 100.0     | 10000             | 99                | 100       |
| Ctel    | 10000.0           | 99.0              | 100.0     | 10000             | 99                | 100       |
| Sman    | 10000.0           | 99.0              | 100.0     | 10000             | 98                | 100       |
| Tadh    | 7628.0            | 99.0              | 100.0     | 5629              | 98                | 100       |
| Hmag    | 10000.0           | 99.0              | 100.0     | 10000             | 99                | 100       |
| Nvec    | 10000.0           | 99.0              | 100.0     | 9406.5            | 98                | 100       |
| Nvex    | 10000.0           | 99.0              | 100.0     | 10000             | 99                | 100       |
| Aipt    | 10000.0           | 99.0              | 100.0     | 8778.5            | 98                | 100       |
| Mlei    | 10000.0           | 99.0              | 100.0     | 10000             | 98                | 100       |
| Aque    | 10000.0           | 99.0              | 100.0     | 10000             | 99                | 100       |
| Ocar    | 10000.0           | 98.5              | 100.0     | 10000             | 97.5              | 100       |
| Scil    | 10000.0           | 99.0              | 100.0     | 9346.5            | 98                | 100       |
| Sros    | 6653.5            | 99.0              | 100.0     | 4789.5            | 98                | 100       |
| Cowc    | 10000.0           | 98.5              | 100.0     | 10000             | 98                | 87        |
| Cfra    | 10000.0           | 99.0              | 100.0     | 10000             | 98                | 100       |
| Sar3    | 10000.0           | 99.0              | 100.0     | 10000             | 98                | 100       |
| Sarc4   | 10000.0           | 99.0              | 100.0     | 10000             | 98                | 100       |
| Nk52    | 10000.0           | 97.5              | 28.0      | 10000             | 98                | 30        |
| Ncrx    | 10000.0           | 96.0              | 39.0      | 10000             | 99                | 48        |
| Spom    | 10000.0           | 94.5              | 22.0      | 10000             | 97                | 21        |
| Aory    | 10000.0           | 98.0              | 65.0      | 10000             | 98                | 57        |
| Cneo    | 10000.0           | 98.5              | 94.0      | 10000             | 97                | 58        |
| Umay    | 10000.0           | 87.0              | 4.0       | 10000             | 96                | 7         |
| Tmel    | 10000.0           | 98.0              | 100.0     | 10000             | 98                | 85        |
| Rory    | 10000.0           | 99.0              | 100.0     | 10000             | 98                | 97        |
| Amac    | 6187.0            | 99.0              | 59.0      | 5542              | 99                | 51        |
| Spun    | 7202.0            | 98.0              | 100.0     | 5701              | 97                | 77        |
| Rirr    | 10000.0           | 99.0              | 100.0     | 9521              | 98                | 100       |
| Rirr2   | 3141.0            | 98.0              | 41.0      | 2983              | 94                | 15        |
| Ccor    | 10000.0           | 98.0              | 66.0      | 10000             | 97                | 39        |
| Gpro    | 10000.0           | 99.0              | 100.0     | 10000             | 99                | 100       |
| Falb    | 10000.0           | 98.0              | 99.0      | 7628              | 97                | 55        |
| Ddis2   | 10000.0           | 97.0              | 39.0      | 10000             | 99                | 42        |
| Ppal    | 10000.0           | 99.0              | 70.0      | 10000             | 99                | 60        |
| Acas    | 10000.0           | 99.0              | 100.0     | 10000             | 99                | 100       |
| Atha    | 10000.0           | 99.0              | 100.0     | 10000             | 99                | 100       |
| Atha3   | 10000.0           | 99.0              | 100.0     | 10000             | 99                | 100       |
| Vvin    | 10000.0           | 99.0              | 100.0     | 10000             | 99                | 100       |
| Mgut    | 10000.0           | 99.0              | 100.0     | 10000             | 99                | 100       |
| Osat2   | 8999.0            | 100.0             | 100.0     | 6125              | 99                | 100       |
| Ppat    | 9404.0            | 99.0              | 100.0     | 6799              | 99                | 100       |
| Marpol  | 10000.0           | 99.0              | 100.0     | 10000             | 98                | 100       |
| Smoe    | 10000.0           | 95.0              | 15.0      | 10000             | 96                | 15        |
| Kfla    | 10000.0           | 99.0              | 100.0     | 10000             | 99                | 100       |
| Vcar    | 10000.0           | 98.0              | 100.0     | 10000             | 99                | 100       |
| Crei    | 10000.0           | 99.0              | 100.0     | 10000             | 99                | 100       |
| Mpus    | 10000.0           | 93.0              | 15.0      | 10000             | 92                | 13        |
| Cpar    | 10000.0           | 94.0              | 56.0      | 10000             | 92                | 29        |
| Gthe    | 10000.0           | 100.0             | 100.0     | 10000             | 99                | 100       |
| GtheME  | 10000.0           | 99.0              | 100.0     | 7745              | 99                | 100       |
| Esil    | 10000.0           | 98.0              | 100.0     | 10000             | 99                | 100       |
| Pinf    | 10000.0           | 98.0              | 61.0      | 10000             | 97                | 48        |
| Aano    | 10000.0           | 83.0              | 6.0       | 10000             | 88.5              | 8         |
| Pfal2   | 10000.0           | 93.0              | 48.0      | 10000             | 95                | 36        |
| Tthe    | 10000.0           | 99.0              | 100.0     | 10000             | 99                | 100       |
| BnatMEA | 10000.0           | 100.0             | 100.0     | 10000             | 99                | 100       |
| Bnat    | 6836.0            | 99.0              | 100.0     | 5268.5            | 99                | 100       |
| Bnao    | 4641.5            | 99.0              | 100.0     | 4324.5            | 98                | 100       |
| Ehux    | 9002.0            | 95.0              | 19.0      | 10000             | 95                | 12        |
| Ngru    | 10000.0           | 96.0              | 20.0      | 10000             | 98                | 26        |

**Fig S5.** Number of bins and sub-sampled reads used in the quantification of ES and IR for each species.

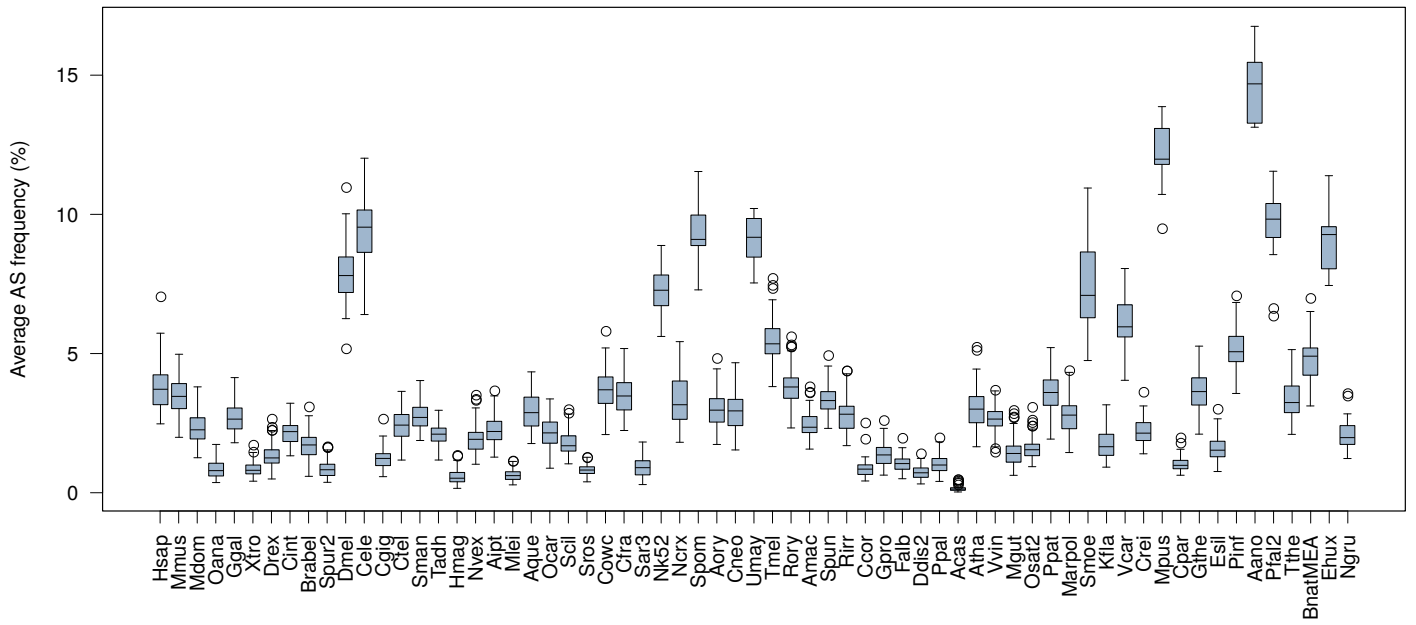

**Fig S6.** Distribution of IR frequencies across 65 eukaryotes (see Supplementary Figure S1 for complete list of transcriptomic datasets). Each box-plot represents the distribution of IR frequencies ( $FIR_{sp}$ ) in a given species (as %), drawn from mapping up to 10,000 RNA-seq reads in 100 exon junctions, in up to 100 independent sub-sets (see Methods and Supplementary Figure S3).

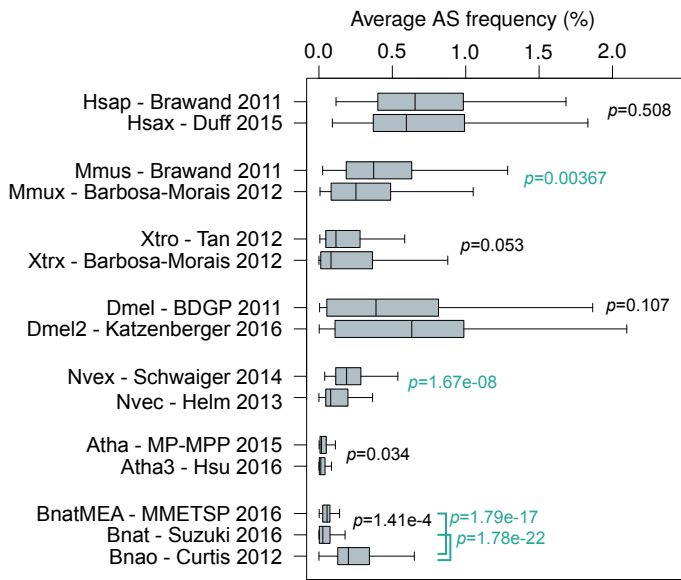

**Fig S7.** Replicate analyses of ES frequency ( $FES,sp$ ) in a selection of species, using independently-generated RNA-seq datasets (see Supplementary Figure S1 for a complete list of transcriptomic dataset sources). Replicate analyses have been performed for *H. sapiens*, *M. musculus*, *X. tropicalis*, *D. melanogaster*, *N. vectensis* (animals), *A. thaliana* (plant) and *B. natans* (chlorarachniophyte).

A) ES frequency, per species and tissue

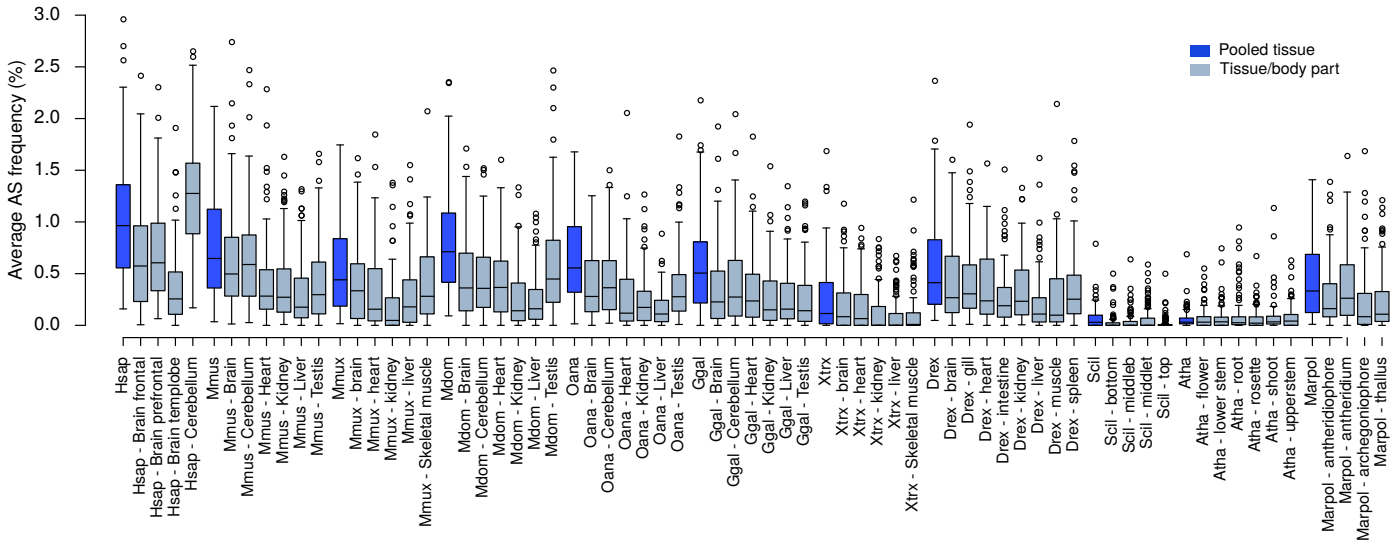

B) ES-positive genes per species and tissue

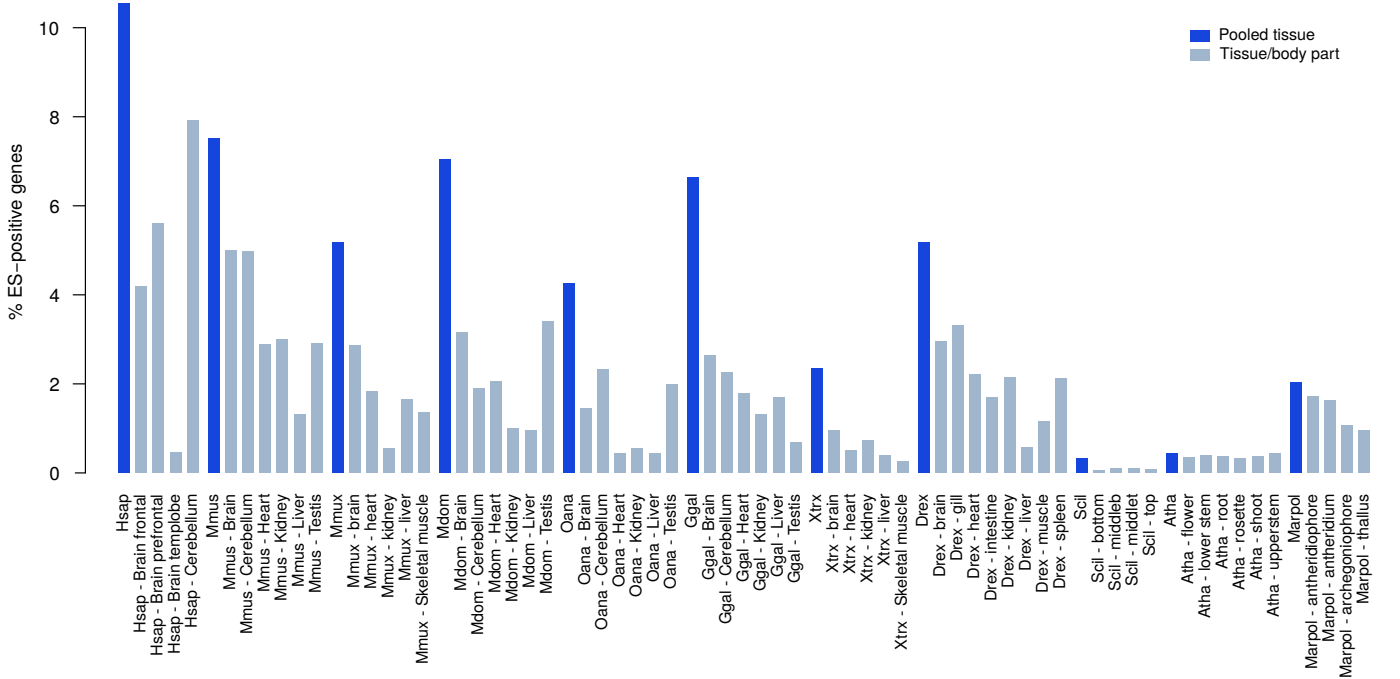

**Fig S8.** Tissue-level ES quantification in samples from selected animals (*H. sapiens*, 2x *M. musculus*, *M. domestica*, *O. anatinus*, *G. gallus*, *X. tropicalis*, *D. rerio*, *S. ciliatum*) and plants (*A. thaliana* and *M. polymorpha*).

A) Percentage of ES-positive genes per sample, including multi-tissue pool.

B) Distribution of ES frequencies per sample, including multi-tissue pool.



**Complement to Fig2 C – Animals only**

| Group i     | Group j     | pval      | D statistic | Ni  | Nj  |
|-------------|-------------|-----------|-------------|-----|-----|
| Verts       | Nonvert-bil | 1.02E-03  | 9.61E-02    | 700 | 800 |
| Verts       | Nonbil      | 2.73E-114 | 5.92E-01    | 700 | 800 |
| Verts       | Unihol      | 1.56E-95  | 6.41E-01    | 700 | 428 |
| Verts       | Uniopi      | 9.10E-262 | 8.64E-01    | 700 | 948 |
| Nonvert-bil | Verts       | 1.21E-01  | 5.32E-02    | 800 | 700 |
| Nonvert-bil | Nonbil      | 5.54E-92  | 5.13E-01    | 800 | 800 |
| Nonvert-bil | Unihol      | 5.53E-77  | 5.61E-01    | 800 | 428 |
| Nonvert-bil | Uniopi      | 1.99E-227 | 7.76E-01    | 800 | 948 |
| Nonbil      | Verts       | 1.00E+00  | -2.17E-17   | 800 | 700 |
| Nonbil      | Nonvert-bil | 1.00E+00  | 0.00E+00    | 800 | 800 |
| Nonbil      | Unihol      | 4.64E-02  | 7.42E-02    | 800 | 428 |
| Nonbil      | Uniopi      | 6.67E-38  | 3.14E-01    | 800 | 948 |
| Unihol      | Verts       | 1.00E+00  | 7.37E-17    | 428 | 700 |
| Unihol      | Nonvert-bil | 1.00E+00  | 9.54E-17    | 428 | 800 |
| Unihol      | Nonbil      | 2.40E-02  | 8.18E-02    | 428 | 800 |
| Unihol      | Uniopi      | 9.85E-25  | 3.06E-01    | 428 | 948 |
| Uniopi      | Verts       | 1.00E+00  | 8.33E-17    | 948 | 700 |
| Uniopi      | Nonvert-bil | 1.00E+00  | 1.05E-16    | 948 | 800 |
| Uniopi      | Nonbil      | 1.00E+00  | 1.05E-16    | 948 | 800 |
| Uniopi      | Unihol      | 1.00E+00  | 9.54E-18    | 948 | 428 |

**Species groupings.**

Verts= "Hsap","Mmus","Mdom","Oana","Ggal","Xtro","Drex"  
 Nonvert-bil= "Cint","Brabel","Spur2","Dmel","Cele","Cgig","Ctel","Sman"  
 Nonbil= "Tadh","Hmag","Nvec","Aipt","Mlei","Aque","Ocar","Scil"  
 Unihol= "Sar3","Sros","Cowc","Cfra","Nk52"  
 Uniopi= "Ncrx","Spom","Aory","Cneo","Umay","Tmel","Rory",  
 "Amac","Spun","Rir","Ccor","Gpro","Falb"

**Hypothesis:**

Alternative hypothesis: the CDF of *i* lies below that of *j*

*Ni*= num bins in group I

*Nj*= num bins in group J

**Complement to Fig2 D – All holozoans**

| Group i         | Group j         | pval      | D statistic | Ni   | Nj   |
|-----------------|-----------------|-----------|-------------|------|------|
| Bilateria       | Cnidaria        | 6.81E-35  | 3.97E-01    | 1500 | 300  |
| Bilateria       | Trichoplax      | 6.49E-57  | 8.31E-01    | 1500 | 100  |
| Bilateria       | Mnemiopsis      | 9.30E-18  | 4.57E-01    | 1500 | 100  |
| Bilateria       | Porifera        | 1.94E-122 | 7.49E-01    | 1500 | 300  |
| Bilateria       | Unicell-Holozoa | 1.20E-102 | 5.94E-01    | 1500 | 428  |
| Cnidaria        | Bilateria       | 1.00E+00  | -9.76E-17   | 300  | 1500 |
| Cnidaria        | Trichoplax      | 3.93E-27  | 6.37E-01    | 300  | 100  |
| Cnidaria        | Mnemiopsis      | 1.55E-02  | 1.67E-01    | 300  | 100  |
| Cnidaria        | Porifera        | 1.07E-28  | 4.63E-01    | 300  | 300  |
| Cnidaria        | Unicell-Holozoa | 1.15E-16  | 3.23E-01    | 300  | 428  |
| Trichoplax      | Bilateria       | 1.00E+00  | -5.42E-17   | 100  | 1500 |
| Trichoplax      | Cnidaria        | 1.00E+00  | 4.34E-17    | 100  | 300  |
| Trichoplax      | Mnemiopsis      | 1.00E+00  | 0.00E+00    | 100  | 100  |
| Trichoplax      | Porifera        | 1.00E+00  | 4.34E-17    | 100  | 300  |
| Trichoplax      | Unicell-Holozoa | 1.00E+00  | -9.54E-17   | 100  | 428  |
| Mnemiopsis      | Bilateria       | 1.00E+00  | -5.42E-17   | 100  | 1500 |
| Mnemiopsis      | Cnidaria        | 4.80E-01  | 7.00E-02    | 100  | 300  |
| Mnemiopsis      | Trichoplax      | 4.48E-19  | 6.50E-01    | 100  | 100  |
| Mnemiopsis      | Porifera        | 2.68E-10  | 3.83E-01    | 100  | 300  |
| Mnemiopsis      | Unicell-Holozoa | 2.06E-04  | 2.29E-01    | 100  | 428  |
| Porifera        | Bilateria       | 1.00E+00  | -9.76E-17   | 300  | 1500 |
| Porifera        | Cnidaria        | 1.00E+00  | 0.00E+00    | 300  | 300  |
| Porifera        | Trichoplax      | 2.95E-08  | 3.40E-01    | 300  | 100  |
| Porifera        | Mnemiopsis      | 1.00E+00  | -4.34E-17   | 300  | 100  |
| Porifera        | Unicell-Holozoa | 1.00E+00  | 9.97E-04    | 300  | 428  |
| Unicell-Holozoa | Bilateria       | 1.00E+00  | 4.12E-17    | 428  | 1500 |
| Unicell-Holozoa | Cnidaria        | 1.00E+00  | 1.39E-16    | 428  | 300  |
| Unicell-Holozoa | Trichoplax      | 2.34E-20  | 5.28E-01    | 428  | 100  |
| Unicell-Holozoa | Mnemiopsis      | 1.00E+00  | 9.54E-17    | 428  | 100  |
| Unicell-Holozoa | Porifera        | 1.13E-07  | 2.13E-01    | 428  | 300  |

**Species groupings.**

Bilateria= "Hsap","Mmus","Mdom","Oana","Ggal","Xtro","Drex",  
 "Cint","Brabel","Spur2","Dmel","Cele","Cgig","Ctel","Sman"  
 Cnidaria-bil= "Hmag","Nvec","Aipt"  
 Trichoplax= Tadh  
 Mnemiopsis= Mlei  
 Porifera= "Aque","Ocar","Scil"  
 Uc. Holozoa= "Sar3","Sros","Cowc","Cfra","Nk52"

**Hypothesis:**

Alternative hypothesis: the CDF of *i* lies below that of *j*

*Ni*= num bins in group I

*Nj*= num bins in group J

**Complement to Fig2 E – Unicell Holozoa**

| Group i | Group j | pval     | D statistic | Ni  | Nj  |
|---------|---------|----------|-------------|-----|-----|
| Sros    | Cowc    | 1.00E+00 | 0.00E+00    | 100 | 100 |
| Sros    | Sarc    | 1.00E+00 | 0.00E+00    | 100 | 100 |
| Sros    | Cfra    | 1.00E+00 | 0.00E+00    | 100 | 100 |
| Sros    | Cper    | 1.00E+00 | -7.63E-17   | 100 | 28  |
| Cowc    | Sros    | 1.78E-26 | 7.70E-01    | 100 | 100 |
| Cowc    | Sarc    | 1.00E+00 | 0.00E+00    | 100 | 100 |
| Cowc    | Cfra    | 5.27E-01 | 8.00E-02    | 100 | 100 |
| Cowc    | Cper    | 9.68E-01 | 2.71E-02    | 100 | 28  |
| Sarc    | Sros    | 2.33E-34 | 8.80E-01    | 100 | 100 |
| Sarc    | Cowc    | 3.78E-27 | 7.80E-01    | 100 | 100 |
| Sarc    | Cfra    | 1.63E-18 | 6.40E-01    | 100 | 100 |
| Sarc    | Cper    | 4.49E-10 | 7.01E-01    | 100 | 28  |
| Cfra    | Sros    | 2.10E-21 | 6.90E-01    | 100 | 100 |
| Cfra    | Cowc    | 6.82E-04 | 2.70E-01    | 100 | 100 |
| Cfra    | Sarc    | 1.00E+00 | 0.00E+00    | 100 | 100 |
| Cfra    | Cper    | 5.49E-01 | 1.17E-01    | 100 | 28  |
| Cper    | Sros    | 6.91E-13 | 8.00E-01    | 28  | 100 |
| Cper    | Cowc    | 3.13E-02 | 2.81E-01    | 28  | 100 |
| Cper    | Sarc    | 9.71E-01 | 2.57E-02    | 28  | 100 |
| Cper    | Cfra    | 5.17E-01 | 1.23E-01    | 28  | 100 |

**Hypothesis:**

Alternative hypothesis: the CDF of *i* lies below that of *j*

*Ni*= num bins in group I

*Nj*= num bins in group J

**Complement to Fig2 F – plants**

| Group i              | Group j              | pval     | D statistic | Ni  | Nj  |
|----------------------|----------------------|----------|-------------|-----|-----|
| Plants               | V. carteri           | 9.28E-01 | 2.09E-02    | 615 | 100 |
| Plants               | Unicell chlorophytes | 4.13E-08 | 2.31E-01    | 615 | 215 |
| Plants               | Unicell Bikonta      | 3.92E-31 | 3.64E-01    | 615 | 462 |
| V. carteri           | Plants               | 9.86E-14 | 4.17E-01    | 100 | 615 |
| V. carteri           | Unicell chlorophytes | 8.67E-22 | 5.96E-01    | 100 | 215 |
| V. carteri           | Unicell Bikonta      | 3.91E-37 | 7.14E-01    | 100 | 462 |
| Unicell chlorophytes | Plants               | 1.00E+00 | 1.30E-17    | 215 | 615 |
| Unicell chlorophytes | V. carteri           | 1.00E+00 | 3.47E-17    | 215 | 100 |
| Unicell chlorophytes | Unicell Bikonta      | 2.69E-07 | 2.27E-01    | 215 | 462 |
| Unicell Bikonta      | Plants               | 1.00E+00 | 5.38E-04    | 462 | 615 |
| Unicell Bikonta      | V. carteri           | 9.99E-01 | 2.16E-03    | 462 | 100 |
| Unicell Bikonta      | Unicell chlorophytes | 9.99E-01 | 2.16E-03    | 462 | 215 |

**Species groupings.**

Plants= "Atha","Vvin","Mgut","Osat2","Ppat","Marpo","Smoe"  
 V. carteri-bil= Vcar  
 Unicell chlorophyta= "Crei","Mpus","Kfla"  
 Unicell bikonta= "Cpar","Pinf","Aano","Pfal","Tthe","Bnat","Ehux","Gthe","Ngru"

**Hypothesis:**

Alternative hypothesis: the CDF of *i* lies below that of *j*

*Ni*= num bins in group I

*Nj*= num bins in group J

**Fig S9.** Inter-group comparisons of ES frequencies using one-sided Kolmogorov-Smirnov 2-sample tests. If significant, ES frequencies are higher in species *i* than *j*. For each comparison, p-values, D statistic and number of observations are reported.

**A) ES frequencies in 65 eukaryotic transcriptomes at 2x sequencing depth**

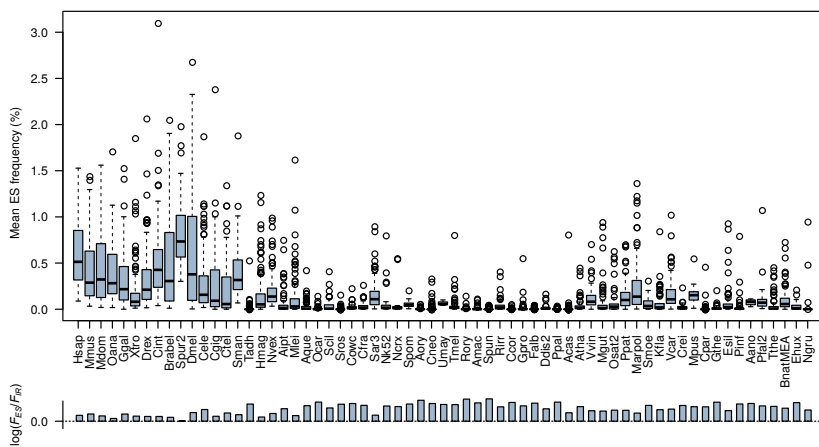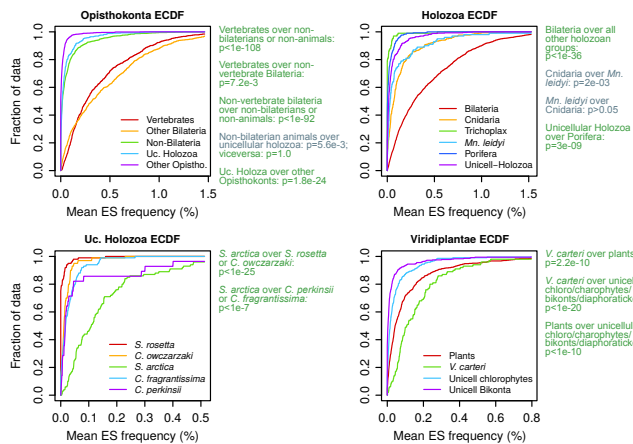

**B) ES frequencies in 65 eukaryotic transcriptomes at 5x sequencing depth**

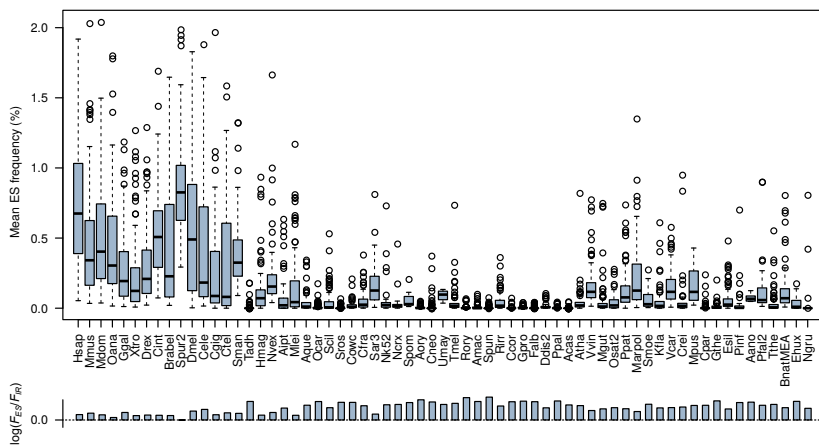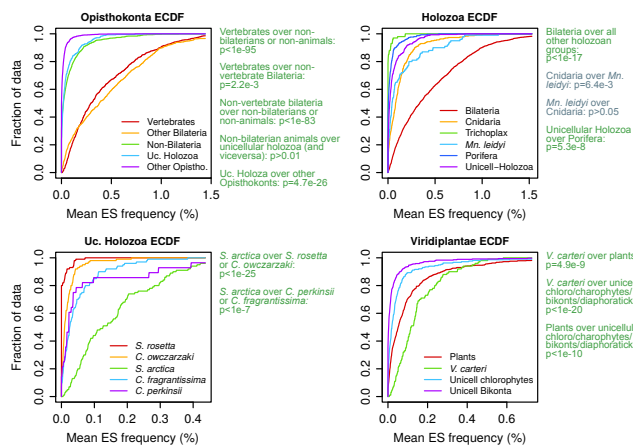

**C) ES frequencies in 65 eukaryotic transcriptomes at 10x sequencing depth**

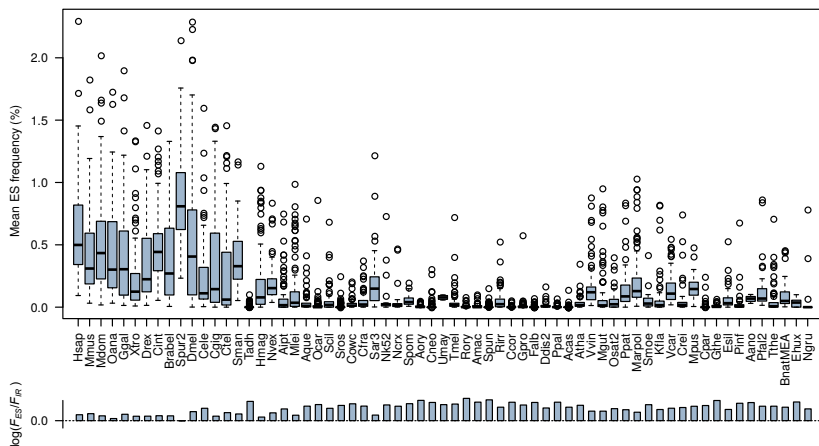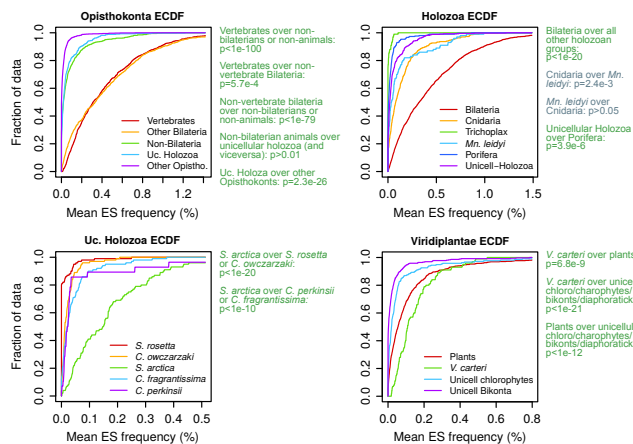

**D) ES frequencies in 65 eukaryotic transcriptomes at 15x sequencing depth**

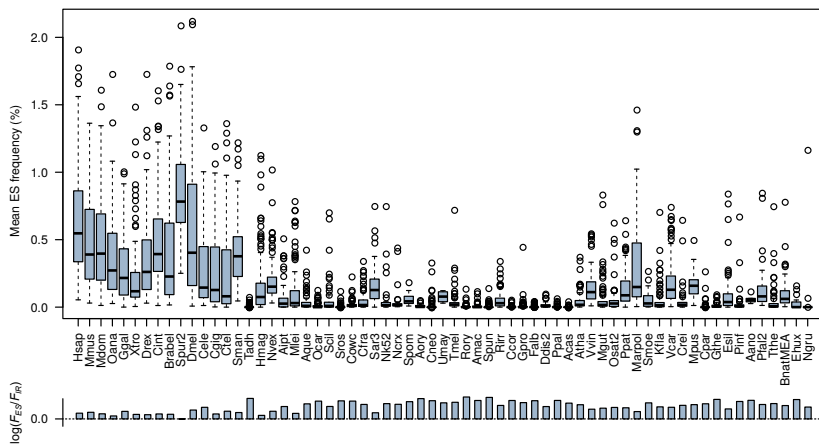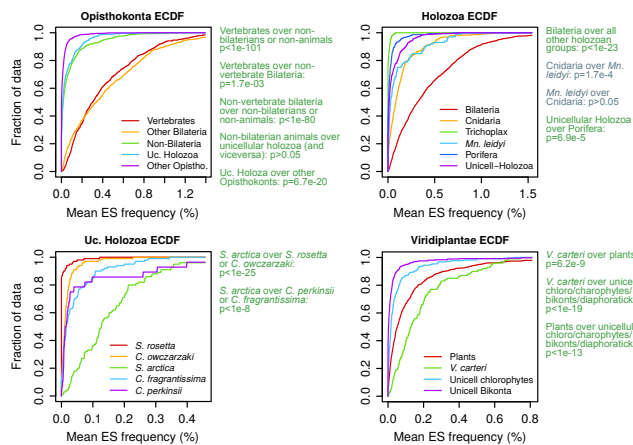

**Fig S10.** Distribution of ES frequencies across 65 eukaryotic transcriptomes (as in Figure 2), downsampling each RNA-seq sample at 2x (A), 5x (B), 10x (C), and 15x (D).

For each downsampling analysis, we report 1) box-plots representing the distribution of ES frequencies ( $FES_{sp}$ ) in a given species (as %; upper left panel); 2) log-ratio of mean  $FES_{sp}$  (for ES) over mean  $FIR_{sp}$  (for IR) in each species (lower left panel); 3) comparisons of ES frequencies among phylogenetically-related eukaryotic groups (right panels) using ECDF plots representing pooled  $FES_{sp}$  values of multiple species.

Comparison plots also report whether the statistical contrasts described in Figure 2 and S7 (one-sided Kolmogorov-Smirnov 2-sample tests) remain significant (in green) or not (in grey) in each RNA-seq downsampling analysis.

| spi     | IR-neg 3n-neg | IR-neg 3n-pos | % IR-neg 3n-pos | IR-pos 3n-neg | IR-pos 3n-pos | % IR-pos 3n-pos | Fisher pval | Fisher statistic | Is there any bias? P<0.01 | % IR positive |
|---------|---------------|---------------|-----------------|---------------|---------------|-----------------|-------------|------------------|---------------------------|---------------|
| Hsap    | 26,595        | 13,383        | 0.335           | 3,007         | 1,512         | 0.335           | 9.87E-01    | 0.999            | FALSE                     | 10.724        |
| Mmus    | 40,705        | 20,456        | 0.334           | 4,413         | 2,157         | 0.328           | 3.22E-01    | 0.973            | FALSE                     | 14.738        |
| Mdom    | 33,246        | 16,758        | 0.335           | 1,982         | 992           | 0.334           | 8.73E-01    | 0.993            | FALSE                     | 8.337         |
| Oana    | 24,950        | 12,346        | 0.331           | 296           | 160           | 0.351           | 3.68E-01    | 1.092            | FALSE                     | 1.793         |
| Ggal    | 28,862        | 14,383        | 0.333           | 2,138         | 1,018         | 0.323           | 2.56E-01    | 0.955            | FALSE                     | 12.400        |
| Xtro    | 31,706        | 15,853        | 0.333           | 417           | 219           | 0.344           | 5.54E-01    | 1.050            | FALSE                     | 2.896         |
| Drex    | 49,843        | 24,869        | 0.333           | 1,399         | 657           | 0.320           | 2.09E-01    | 0.941            | FALSE                     | 6.077         |
| Cint    | 8,870         | 4,488         | 0.336           | 273           | 133           | 0.328           | 7.49E-01    | 0.963            | FALSE                     | 2.117         |
| Brabel  | 48,424        | 24,061        | 0.332           | 1,780         | 884           | 0.332           | 1.00E+00    | 0.999            | FALSE                     | 6.367         |
| Spur2   | 17,169        | 8,429         | 0.329           | 202           | 97            | 0.324           | 9.02E-01    | 0.978            | FALSE                     | 0.853         |
| Dmel    | 8,324         | 4,079         | 0.329           | 2,801         | 1,397         | 0.333           | 6.49E-01    | 1.018            | FALSE                     | 15.858        |
| Cele    | 19,476        | 9,559         | 0.329           | 8,946         | 4,416         | 0.330           | 7.98E-01    | 1.006            | FALSE                     | 31.873        |
| Cgig    | 30,939        | 15,354        | 0.332           | 667           | 326           | 0.328           | 8.38E-01    | 0.985            | FALSE                     | 2.848         |
| Ctel    | 24,212        | 11,534        | 0.323           | 1,489         | 704           | 0.321           | 8.88E-01    | 0.992            | FALSE                     | 5.187         |
| Sman    | 9,668         | 4,725         | 0.328           | 711           | 325           | 0.314           | 3.55E-01    | 0.935            | FALSE                     | 6.665         |
| Tadh    | 13,090        | 6,415         | 0.329           | 334           | 166           | 0.332           | 8.85E-01    | 1.014            | FALSE                     | 3.490         |
| Hmag    | 20,628        | 10,337        | 0.334           | 143           | 72            | 0.335           | 1.00E+00    | 1.005            | FALSE                     | 1.018         |
| Nvex    | 22,681        | 11,121        | 0.329           | 979           | 516           | 0.345           | 1.96E-01    | 1.075            | FALSE                     | 4.961         |
| Aipt    | 17,460        | 8,838         | 0.336           | 777           | 423           | 0.353           | 2.48E-01    | 1.075            | FALSE                     | 3.017         |
| Mlei    | 12,689        | 6,309         | 0.332           | 94            | 41            | 0.304           | 5.22E-01    | 0.877            | FALSE                     | 0.735         |
| Aque    | 21,605        | 10,695        | 0.331           | 1,933         | 894           | 0.316           | 1.08E-01    | 0.934            | FALSE                     | 4.626         |
| Ocar    | 11,879        | 5,743         | 0.326           | 731           | 353           | 0.326           | 1.00E+00    | 0.999            | FALSE                     | 7.084         |
| Scil    | 13,580        | 6,819         | 0.334           | 399           | 200           | 0.334           | 1.00E+00    | 0.998            | FALSE                     | 2.003         |
| Sros    | 10,602        | 5,124         | 0.326           | 81            | 46            | 0.362           | 3.93E-01    | 1.175            | FALSE                     | 1.075         |
| Cowc    | 5,347         | 2,576         | 0.325           | 552           | 252           | 0.313           | 5.27E-01    | 0.948            | FALSE                     | 6.773         |
| Cfra    | 13,520        | 6,734         | 0.332           | 1,411         | 687           | 0.327           | 6.61E-01    | 0.978            | FALSE                     | 15.263        |
| Sar3    | 14,413        | 7,120         | 0.331           | 286           | 129           | 0.311           | 4.29E-01    | 0.913            | FALSE                     | 1.817         |
| Nk52    | 1,540         | 765           | 0.332           | 502           | 219           | 0.304           | 1.72E-01    | 0.878            | FALSE                     | 4.148         |
| Ncrx    | 2,966         | 1,422         | 0.324           | 268           | 157           | 0.369           | 5.85E-02    | 1.222            | FALSE                     | 3.849         |
| Spom    | 961           | 460           | 0.324           | 451           | 242           | 0.349           | 2.58E-01    | 1.121            | FALSE                     | 9.545         |
| Aory    | 3,683         | 1,646         | 0.309           | 319           | 142           | 0.308           | 1.00E+00    | 0.996            | FALSE                     | 3.064         |
| Cneo    | 3,670         | 1,739         | 0.322           | 314           | 138           | 0.305           | 4.96E-01    | 0.928            | FALSE                     | 5.659         |
| Umay    | 368           | 162           | 0.306           | 168           | 59            | 0.260           | 2.22E-01    | 0.798            | FALSE                     | 2.959         |
| Tmel    | 4,780         | 2,334         | 0.328           | 987           | 459           | 0.317           | 4.42E-01    | 0.952            | FALSE                     | 13.514        |
| Rory    | 5,924         | 2,832         | 0.323           | 656           | 292           | 0.308           | 3.42E-01    | 0.931            | FALSE                     | 4.731         |
| Amac    | 3,361         | 1,589         | 0.321           | 179           | 66            | 0.269           | 9.23E-02    | 0.780            | FALSE                     | 1.246         |
| Spun    | 4,942         | 2,319         | 0.319           | 376           | 161           | 0.300           | 3.62E-01    | 0.913            | FALSE                     | 4.982         |
| Rirr    | 8,040         | 4,081         | 0.337           | 606           | 302           | 0.333           | 8.27E-01    | 0.982            | FALSE                     | 2.398         |
| Ccor    | 2,646         | 1,304         | 0.330           | 27            | 10            | 0.270           | 4.88E-01    | 0.752            | FALSE                     | 0.320         |
| Gpro    | 12,264        | 5,684         | 0.317           | 328           | 156           | 0.322           | 8.05E-01    | 1.026            | FALSE                     | 2.956         |
| Falb    | 3,670         | 1,775         | 0.326           | 44            | 13            | 0.228           | 1.54E-01    | 0.611            | FALSE                     | 0.935         |
| Ddis2   | 2,795         | 1,439         | 0.340           | 22            | 10            | 0.313           | 8.52E-01    | 0.883            | FALSE                     | 0.242         |
| Ppal    | 3,975         | 1,956         | 0.330           | 73            | 23            | 0.240           | 6.31E-02    | 0.640            | FALSE                     | 0.695         |
| Acas    | 16,658        | 8,103         | 0.327           | 14            | 9             | 0.391           | 5.11E-01    | 1.322            | FALSE                     | 0.147         |
| Atha    | 29,349        | 14,417        | 0.329           | 2,395         | 1,195         | 0.333           | 6.71E-01    | 1.016            | FALSE                     | 9.363         |
| Vvin    | 20,767        | 10,105        | 0.327           | 1,460         | 763           | 0.343           | 1.23E-01    | 1.074            | FALSE                     | 5.109         |
| Mgut    | 26,074        | 13,224        | 0.337           | 738           | 351           | 0.322           | 3.46E-01    | 0.938            | FALSE                     | 3.323         |
| Osat2   | 10,286        | 5,239         | 0.337           | 262           | 131           | 0.333           | 9.14E-01    | 0.982            | FALSE                     | 1.029         |
| Ppat    | 17,338        | 8,576         | 0.331           | 1,864         | 974           | 0.343           | 1.93E-01    | 1.056            | FALSE                     | 6.265         |
| Marpol  | 18,396        | 9,208         | 0.334           | 1,473         | 730           | 0.331           | 8.51E-01    | 0.990            | FALSE                     | 7.186         |
| Smoe    | 790           | 374           | 0.321           | 238           | 116           | 0.328           | 8.46E-01    | 1.030            | FALSE                     | 0.828         |
| Kfla    | 19,087        | 9,447         | 0.331           | 801           | 413           | 0.340           | 5.13E-01    | 1.042            | FALSE                     | 5.845         |
| Vcar    | 16,235        | 7,977         | 0.329           | 3,642         | 1,738         | 0.323           | 3.69E-01    | 0.971            | FALSE                     | 20.390        |
| Crei    | 17,232        | 8,604         | 0.333           | 640           | 361           | 0.361           | 7.04E-02    | 1.130            | FALSE                     | 5.300         |
| Mpus    | 518           | 258           | 0.332           | 375           | 157           | 0.295           | 1.64E-01    | 0.841            | FALSE                     | 3.712         |
| Cpar    | 1,990         | 883           | 0.307           | 35            | 18            | 0.340           | 6.53E-01    | 1.159            | FALSE                     | 0.381         |
| Gthe    | 23,553        | 11,107        | 0.320           | 3,038         | 1,457         | 0.324           | 6.22E-01    | 1.017            | FALSE                     | 8.346         |
| Esil    | 28,134        | 13,844        | 0.330           | 1,052         | 495           | 0.320           | 4.25E-01    | 0.956            | FALSE                     | 7.025         |
| Pinf    | 2,806         | 1,334         | 0.322           | 494           | 245           | 0.332           | 6.39E-01    | 1.043            | FALSE                     | 3.396         |
| Aano    | 280           | 113           | 0.288           | 329           | 144           | 0.304           | 6.02E-01    | 1.084            | FALSE                     | 2.483         |
| Pfal2   | 1,625         | 854           | 0.344           | 762           | 369           | 0.326           | 2.89E-01    | 0.921            | FALSE                     | 14.451        |
| Tthe    | 12,277        | 4,788         | 0.281           | 939           | 370           | 0.283           | 8.73E-01    | 1.010            | FALSE                     | 3.919         |
| BnatMEA | 33,268        | 16,367        | 0.330           | 5,911         | 2,804         | 0.322           | 1.45E-01    | 0.964            | FALSE                     | 22.455        |
| Ehux    | 613           | 303           | 0.331           | 240           | 125           | 0.342           | 6.94E-01    | 1.054            | FALSE                     | 0.680         |
| Ngru    | 1,752         | 782           | 0.309           | 75            | 47            | 0.385           | 8.85E-02    | 1.404            | FALSE                     | 0.719         |

**Fig S11.** Enrichment in 3n-divisibility of intron lengths in IR events from whole transcriptomes ('all'), with Fisher's exact test.

A) Whole transcriptome

| spi     | ES-neg 3n-neg | ES-neg 3n-pos | % ES-neg 3n-pos | ES-pos 3n-neg | ES-pos 3n-pos | % ES-pos 3n-pos | Fisher pval | Fisher statistic | Is there any bias? P<0.01 | ES-positive % |
|---------|---------------|---------------|-----------------|---------------|---------------|-----------------|-------------|------------------|---------------------------|---------------|
| Hsap    | 52,747        | 34,658        | 0.397           | 1,182         | 1,377         | 0.538           | 5.83E-46    | 1.773            | TRUE                      | 10.538        |
| Mmus    | 73,063        | 48,503        | 0.399           | 650           | 1,328         | 0.671           | 1.09E-129   | 3.078            | TRUE                      | 7.513         |
| Mdom    | 59,150        | 39,096        | 0.398           | 558           | 1,228         | 0.688           | 2.15E-132   | 3.330            | TRUE                      | 7.043         |
| Oana    | 38,757        | 26,168        | 0.403           | 352           | 663           | 0.653           | 4.64E-57    | 2.790            | TRUE                      | 4.249         |
| Ggal    | 54,658        | 35,869        | 0.396           | 427           | 768           | 0.643           | 4.75E-65    | 2.741            | TRUE                      | 6.635         |
| Xtro    | 50,021        | 33,800        | 0.403           | 198           | 454           | 0.696           | 4.65E-51    | 3.393            | TRUE                      | 3.226         |
| Drex    | 82,685        | 56,060        | 0.404           | 400           | 1,154         | 0.743           | 1.60E-159   | 4.255            | TRUE                      | 5.178         |
| Cint    | 16,557        | 10,144        | 0.380           | 386           | 245           | 0.388           | 6.78E-01    | 1.036            | FALSE                     | 3.551         |
| Brabel  | 72,694        | 50,442        | 0.410           | 280           | 1,295         | 0.822           | 5.81E-245   | 6.666            | TRUE                      | 4.208         |
| Spur2   | 23,998        | 16,463        | 0.407           | 1,134         | 741           | 0.395           | 3.24E-01    | 0.953            | FALSE                     | 5.343         |
| Dmel    | 14,973        | 8,659         | 0.366           | 62            | 335           | 0.844           | 3.41E-84    | 9.340            | TRUE                      | 2.457         |
| Cele    | 38,663        | 24,813        | 0.391           | 191           | 425           | 0.690           | 3.67E-50    | 3.467            | TRUE                      | 2.724         |
| Cgig    | 47,042        | 32,461        | 0.408           | 161           | 496           | 0.755           | 5.31E-72    | 4.464            | TRUE                      | 2.116         |
| Ctel    | 39,205        | 25,909        | 0.398           | 116           | 366           | 0.759           | 7.66E-58    | 4.774            | TRUE                      | 1.321         |
| Sman    | 15,931        | 10,349        | 0.394           | 303           | 187           | 0.382           | 6.08E-01    | 0.950            | FALSE                     | 4.289         |
| Tadh    | 25,836        | 17,523        | 0.404           | 8             | 12            | 0.600           | 1.08E-01    | 2.212            | FALSE                     | 0.174         |
| Hmag    | 32,045        | 22,426        | 0.412           | 181           | 160           | 0.469           | 3.58E-02    | 1.263            | FALSE                     | 1.641         |
| Nvex    | 31,930        | 21,510        | 0.403           | 166           | 169           | 0.504           | 1.76E-04    | 1.511            | TRUE                      | 1.284         |
| Aipt    | 31,841        | 22,907        | 0.418           | 47            | 77            | 0.621           | 6.41E-06    | 2.277            | TRUE                      | 0.420         |
| Mlei    | 22,173        | 13,495        | 0.378           | 38            | 127           | 0.770           | 2.81E-24    | 5.491            | TRUE                      | 0.953         |
| Aque    | 36,229        | 27,446        | 0.431           | 56            | 47            | 0.456           | 6.20E-01    | 1.108            | FALSE                     | 0.252         |
| Ocar    | 17,558        | 13,405        | 0.433           | 7             | 5             | 0.417           | 1.00E+00    | 0.936            | FALSE                     | 0.108         |
| Scil    | 26,985        | 20,166        | 0.428           | 44            | 41            | 0.482           | 3.25E-01    | 1.247            | FALSE                     | 0.326         |
| Sros    | NA            | NA            | NA              | NA            | NA            | NA              | NA          | NA               | NA                        | 0.069         |
| Cowc    | NA            | NA            | NA              | NA            | NA            | NA              | NA          | NA               | NA                        | 0.103         |
| Cfra    | 25,903        | 15,767        | 0.378           | 52            | 27            | 0.342           | 5.62E-01    | 0.853            | FALSE                     | 0.897         |
| Sar3    | 23,723        | 13,956        | 0.370           | 226           | 91            | 0.287           | 2.33E-03    | 0.684            | TRUE                      | 1.823         |
| Nk52    | NA            | NA            | NA              | NA            | NA            | NA              | NA          | NA               | NA                        | 0.040         |
| Ncrx    | NA            | NA            | NA              | NA            | NA            | NA              | NA          | NA               | NA                        | 0.051         |
| Spom    | NA            | NA            | NA              | NA            | NA            | NA              | NA          | NA               | NA                        | 0.097         |
| Aory    | NA            | NA            | NA              | NA            | NA            | NA              | NA          | NA               | NA                        | 0.000         |
| Cneo    | NA            | NA            | NA              | NA            | NA            | NA              | NA          | NA               | NA                        | 0.086         |
| Umay    | NA            | NA            | NA              | NA            | NA            | NA              | NA          | NA               | NA                        | 0.000         |
| Tmel    | 6,774         | 3,684         | 0.352           | 7             | 4             | 0.364           | 1.00E+00    | 1.051            | FALSE                     | 0.147         |
| Rory    | NA            | NA            | NA              | NA            | NA            | NA              | NA          | NA               | NA                        | 0.023         |
| Amac    | NA            | NA            | NA              | NA            | NA            | NA              | NA          | NA               | NA                        | 0.016         |
| Spun    | NA            | NA            | NA              | NA            | NA            | NA              | NA          | NA               | NA                        | 0.034         |
| Rirr    | 13,729        | 8,163         | 0.373           | 38            | 11            | 0.224           | 3.74E-02    | 0.487            | FALSE                     | 0.164         |
| Ccor    | NA            | NA            | NA              | NA            | NA            | NA              | NA          | NA               | NA                        | 0.009         |
| Gpro    | NA            | NA            | NA              | NA            | NA            | NA              | NA          | NA               | NA                        | 0.029         |
| Falb    | NA            | NA            | NA              | NA            | NA            | NA              | NA          | NA               | NA                        | 0.000         |
| Ddis2   | NA            | NA            | NA              | NA            | NA            | NA              | NA          | NA               | NA                        | 0.038         |
| Ppal    | NA            | NA            | NA              | NA            | NA            | NA              | NA          | NA               | NA                        | 0.000         |
| Acas    | NA            | NA            | NA              | NA            | NA            | NA              | NA          | NA               | NA                        | 0.033         |
| Atha    | 41,473        | 34,587        | 0.455           | 71            | 49            | 0.408           | 3.15E-01    | 0.828            | FALSE                     | 0.430         |
| Vvin    | 30,632        | 25,667        | 0.456           | 239           | 112           | 0.319           | 2.13E-07    | 0.559            | TRUE                      | 1.129         |
| Mgut    | 37,281        | 30,622        | 0.451           | 98            | 52            | 0.347           | 1.08E-02    | 0.646            | FALSE                     | 0.536         |
| Osat2   | 20,132        | 16,722        | 0.454           | 38            | 32            | 0.457           | 1.00E+00    | 1.014            | FALSE                     | 0.196         |
| Ppat    | 30,423        | 25,670        | 0.458           | 266           | 130           | 0.328           | 2.11E-07    | 0.579            | TRUE                      | 1.193         |
| Marpol  | 27,268        | 23,453        | 0.462           | 254           | 169           | 0.400           | 1.08E-02    | 0.774            | FALSE                     | 2.027         |
| Smoe    | NA            | NA            | NA              | NA            | NA            | NA              | NA          | NA               | NA                        | 0.014         |
| Kfla    | 26,808        | 21,736        | 0.448           | 42            | 34            | 0.447           | 1.00E+00    | 0.998            | FALSE                     | 0.435         |
| Vcar    | 29,686        | 23,261        | 0.439           | 265           | 180           | 0.404           | 1.50E-01    | 0.867            | FALSE                     | 2.955         |
| Crei    | 23,980        | 18,423        | 0.434           | 25            | 23            | 0.479           | 5.62E-01    | 1.197            | FALSE                     | 0.333         |
| Mpus    | 836           | 713           | 0.460           | 9             | 4             | 0.308           | 4.03E-01    | 0.521            | FALSE                     | 0.131         |
| Cpar    | NA            | NA            | NA              | NA            | NA            | NA              | NA          | NA               | NA                        | 0.027         |
| Gthe    | 35,801        | 27,449        | 0.434           | 8             | 6             | 0.429           | 1.00E+00    | 0.978            | FALSE                     | 0.056         |
| Esil    | 35,599        | 36,092        | 0.503           | 124           | 99            | 0.444           | 8.12E-02    | 0.787            | FALSE                     | 1.291         |
| Pinf    | NA            | NA            | NA              | NA            | NA            | NA              | NA          | NA               | NA                        | 0.034         |
| Aano    | NA            | NA            | NA              | NA            | NA            | NA              | NA          | NA               | NA                        | 0.017         |
| Pfal2   | 2,946         | 1,850         | 0.386           | 14            | 10            | 0.417           | 8.34E-01    | 1.137            | FALSE                     | 0.411         |
| Tthe    | 16,232        | 11,789        | 0.421           | 14            | 36            | 0.720           | 2.19E-05    | 3.540            | TRUE                      | 0.194         |
| BnatMEA | 59,443        | 37,511        | 0.387           | 199           | 92            | 0.316           | 1.34E-02    | 0.733            | FALSE                     | 1.189         |
| Ehux    | NA            | NA            | NA              | NA            | NA            | NA              | NA          | NA               | NA                        | 0.013         |
| Ngru    | NA            | NA            | NA              | NA            | NA            | NA              | NA          | NA               | NA                        | 0.019         |

NA=less than 10 exons in any group; discarded

**Fig S12.** Enrichment in 3n-divisibility of exon lengths in ES events, measured with Fisher's exact test. Includes data from:

- (A) whole transcriptomes ('all')
- (B) a sub-set of above-median gene expression and length ('high constraint' or 'HC' dataset)
- (C) a sub-set with high ES frequency.

B) 'High constraint' gene sub-set (above median expression and gene length)

| spi     | ES-neg 3n-neg | ES-neg 3n-pos | % ES-neg 3n-pos | ES-pos 3n-neg | ES-pos 3n-pos | % ES-pos 3n-pos | Fisher pval | Fisher statistic | Is there any bias? P<0.01 | ES-positive % |
|---------|---------------|---------------|-----------------|---------------|---------------|-----------------|-------------|------------------|---------------------------|---------------|
| Hsap    | 26,873        | 17,662        | 0.397           | 436           | 750           | 0.632           | 1.53E-58    | 2.617            | TRUE                      | 10.538        |
| Mmus    | 37,139        | 24,095        | 0.393           | 194           | 703           | 0.784           | 9.11E-124   | 5.585            | TRUE                      | 7.513         |
| Mdom    | 29,868        | 19,763        | 0.398           | 184           | 628           | 0.773           | 2.47E-103   | 5.158            | TRUE                      | 7.043         |
| Oana    | 19,701        | 13,174        | 0.401           | 132           | 289           | 0.686           | 9.50E-32    | 3.274            | TRUE                      | 4.249         |
| Ggal    | 27,936        | 17,920        | 0.391           | 165           | 419           | 0.717           | 1.29E-56    | 3.959            | TRUE                      | 6.635         |
| Xtro    | 25,321        | 17,075        | 0.403           | 58            | 206           | 0.780           | 1.97E-35    | 5.267            | TRUE                      | 3.226         |
| Drex    | 42,245        | 27,523        | 0.394           | 135           | 525           | 0.795           | 2.30E-97    | 5.969            | TRUE                      | 5.178         |
| Cint    | 8,696         | 5,366         | 0.382           | 90            | 71            | 0.441           | 1.42E-01    | 1.278            | FALSE                     | 3.551         |
| Brabel  | 36,632        | 25,511        | 0.411           | 74            | 776           | 0.913           | 2.67E-207   | 15.057           | TRUE                      | 4.208         |
| Spur2   | 12,338        | 8,526         | 0.409           | 367           | 276           | 0.429           | 3.09E-01    | 1.088            | FALSE                     | 5.343         |
| Dmel    | 7,456         | 4,384         | 0.370           | 19            | 204           | 0.915           | 3.29E-64    | 18.257           | TRUE                      | 2.457         |
| Cele    | 19,463        | 12,570        | 0.392           | 62            | 257           | 0.806           | 5.83E-51    | 6.418            | TRUE                      | 2.724         |
| Cgig    | 23,774        | 16,250        | 0.406           | 64            | 337           | 0.840           | 6.10E-71    | 7.702            | TRUE                      | 2.116         |
| Ctel    | 19,669        | 12,992        | 0.398           | 61            | 242           | 0.799           | 1.36E-45    | 6.006            | TRUE                      | 1.321         |
| Sman    | 8,155         | 5,317         | 0.395           | 126           | 97            | 0.435           | 2.40E-01    | 1.181            | FALSE                     | 4.289         |
| Tadh    | NA            | NA            | NA              | NA            | NA            | NA              | NA          | NA               | NA                        | 0.174         |
| Hmag    | 16,787        | 11,831        | 0.413           | 65            | 75            | 0.536           | 4.37E-03    | 1.637            | TRUE                      | 1.641         |
| Nvex    | 15,828        | 11,095        | 0.412           | 30            | 62            | 0.674           | 6.03E-07    | 2.948            | TRUE                      | 1.284         |
| Aipt    | 15,824        | 11,908        | 0.429           | 14            | 39            | 0.736           | 9.14E-06    | 3.702            | TRUE                      | 0.420         |
| Mlei    | 11,223        | 6,857         | 0.379           | 19            | 75            | 0.798           | 1.93E-16    | 6.460            | TRUE                      | 0.953         |
| Aque    | 19,012        | 13,773        | 0.420           | 14            | 10            | 0.417           | 1.00E+00    | 0.986            | FALSE                     | 0.252         |
| Ocar    | NA            | NA            | NA              | NA            | NA            | NA              | NA          | NA               | NA                        | 0.108         |
| Scil    | 13,402        | 10,479        | 0.439           | 28            | 26            | 0.481           | 5.84E-01    | 1.188            | FALSE                     | 0.326         |
| Sros    | NA            | NA            | NA              | NA            | NA            | NA              | NA          | NA               | NA                        | 0.069         |
| Cowc    | NA            | NA            | NA              | NA            | NA            | NA              | NA          | NA               | NA                        | 0.103         |
| Cfra    | 12,952        | 8,272         | 0.390           | 5             | 9             | 0.643           | 5.94E-02    | 2.818            | FALSE                     | 0.897         |
| Sar3    | 11,882        | 7,145         | 0.376           | 62            | 27            | 0.303           | 1.88E-01    | 0.724            | FALSE                     | 1.823         |
| Nk52    | NA            | NA            | NA              | NA            | NA            | NA              | NA          | NA               | NA                        | 0.040         |
| Ncix    | NA            | NA            | NA              | NA            | NA            | NA              | NA          | NA               | NA                        | 0.051         |
| Spom    | NA            | NA            | NA              | NA            | NA            | NA              | NA          | NA               | NA                        | 0.097         |
| Aory    | NA            | NA            | NA              | NA            | NA            | NA              | NA          | NA               | NA                        | 0.000         |
| Cneo    | NA            | NA            | NA              | NA            | NA            | NA              | NA          | NA               | NA                        | 0.086         |
| Umay    | NA            | NA            | NA              | NA            | NA            | NA              | NA          | NA               | NA                        | 0.000         |
| Tmel    | NA            | NA            | NA              | NA            | NA            | NA              | NA          | NA               | NA                        | 0.147         |
| Rory    | NA            | NA            | NA              | NA            | NA            | NA              | NA          | NA               | NA                        | 0.023         |
| Amac    | NA            | NA            | NA              | NA            | NA            | NA              | NA          | NA               | NA                        | 0.016         |
| Spun    | NA            | NA            | NA              | NA            | NA            | NA              | NA          | NA               | NA                        | 0.034         |
| Rirr    | 7,008         | 4,069         | 0.367           | 10            | 6             | 0.375           | 1.00E+00    | 1.033            | FALSE                     | 0.164         |
| Ccor    | NA            | NA            | NA              | NA            | NA            | NA              | NA          | NA               | NA                        | 0.009         |
| Gpro    | NA            | NA            | NA              | NA            | NA            | NA              | NA          | NA               | NA                        | 0.029         |
| Falb    | NA            | NA            | NA              | NA            | NA            | NA              | NA          | NA               | NA                        | 0.000         |
| Ddis2   | NA            | NA            | NA              | NA            | NA            | NA              | NA          | NA               | NA                        | 0.038         |
| Ppal    | NA            | NA            | NA              | NA            | NA            | NA              | NA          | NA               | NA                        | 0.000         |
| Acas    | NA            | NA            | NA              | NA            | NA            | NA              | NA          | NA               | NA                        | 0.033         |
| Atha    | 20,328        | 17,810        | 0.467           | 16            | 13            | 0.448           | 8.55E-01    | 0.927            | FALSE                     | 0.430         |
| Vvin    | 15,286        | 13,034        | 0.460           | 69            | 35            | 0.337           | 1.34E-02    | 0.595            | FALSE                     | 1.129         |
| Mgut    | 18,476        | 15,699        | 0.459           | 18            | 21            | 0.538           | 3.39E-01    | 1.373            | FALSE                     | 0.536         |
| Osat2   | 10,156        | 8,556         | 0.457           | 8             | 11            | 0.579           | 3.58E-01    | 1.632            | FALSE                     | 0.196         |
| Ppat    | 15,578        | 12,986        | 0.455           | 121           | 66            | 0.353           | 6.26E-03    | 0.654            | TRUE                      | 1.193         |
| Marpol  | 13,750        | 11,719        | 0.460           | 66            | 90            | 0.577           | 3.69E-03    | 1.600            | TRUE                      | 2.027         |
| Smoe    | NA            | NA            | NA              | NA            | NA            | NA              | NA          | NA               | NA                        | 0.014         |
| Kfla    | 13,347        | 10,987        | 0.452           | 13            | 20            | 0.606           | 8.16E-02    | 1.869            | FALSE                     | 0.435         |
| Vcar    | 14,841        | 11,731        | 0.441           | 124           | 91            | 0.423           | 6.30E-01    | 0.928            | FALSE                     | 2.955         |
| Crei    | 12,044        | 9,337         | 0.437           | 5             | 11            | 0.688           | 7.41E-02    | 2.838            | FALSE                     | 0.333         |
| Mpus    | NA            | NA            | NA              | NA            | NA            | NA              | NA          | NA               | NA                        | 0.131         |
| Cpar    | NA            | NA            | NA              | NA            | NA            | NA              | NA          | NA               | NA                        | 0.027         |
| Gthe    | NA            | NA            | NA              | NA            | NA            | NA              | NA          | NA               | NA                        | 0.056         |
| Esil    | 17,890        | 18,220        | 0.505           | 28            | 25            | 0.472           | 6.81E-01    | 0.877            | FALSE                     | 1.291         |
| Pinf    | NA            | NA            | NA              | NA            | NA            | NA              | NA          | NA               | NA                        | 0.034         |
| Aano    | NA            | NA            | NA              | NA            | NA            | NA              | NA          | NA               | NA                        | 0.017         |
| Pfal2   | NA            | NA            | NA              | NA            | NA            | NA              | NA          | NA               | NA                        | 0.411         |
| Tthe    | 8,446         | 5,740         | 0.405           | 5             | 7             | 0.583           | 2.45E-01    | 2.060            | FALSE                     | 0.194         |
| BnatMEA | 29,557        | 19,009        | 0.391           | 122           | 44            | 0.265           | 7.78E-04    | 0.561            | TRUE                      | 1.189         |
| Ehux    | NA            | NA            | NA              | NA            | NA            | NA              | NA          | NA               | NA                        | 0.013         |
| Ngru    | NA            | NA            | NA              | NA            | NA            | NA              | NA          | NA               | NA                        | 0.019         |

NA=less than 10 exons in any group; discarded

**Fig S12 (continued).** Enrichment in 3n-divisibility of exon lengths in ES events, measured with Fisher's exact test. Includes data from:

(A) whole transcriptomes ('all')

(B) a sub-set of above-median gene expression and length ('high constraint' or 'HC' dataset)

(C) a sub-set with high ES frequency.

C) High ES frequency (rES = 30-70%)

| spi     | ES-neg 3n-neg | ES-neg 3n-pos | % ES-neg 3n-pos | ES-pos 3n-neg | ES-pos 3n-pos | % ES-pos 3n-pos | Fisher pval | Fisher statistic | Is there any bias? P<0.01 | ES-positive % |
|---------|---------------|---------------|-----------------|---------------|---------------|-----------------|-------------|------------------|---------------------------|---------------|
| Hsap    | 54,914        | 36,247        | 0.398           | 271           | 500           | 0.649           | 2.57E-44    | 2.795            | TRUE                      | 10.538        |
| Mmus    | 74,149        | 49,507        | 0.400           | 123           | 531           | 0.812           | 1.66E-102   | 6.467            | TRUE                      | 7.513         |
| Mdom    | 60,525        | 40,320        | 0.400           | 125           | 497           | 0.799           | 2.04E-91    | 5.968            | TRUE                      | 7.043         |
| Oana    | 39,746        | 27,059        | 0.405           | 92            | 244           | 0.726           | 2.08E-32    | 3.896            | TRUE                      | 4.249         |
| Ggal    | 56,017        | 36,834        | 0.397           | 91            | 340           | 0.789           | 1.36E-61    | 5.682            | TRUE                      | 6.635         |
| Xtro    | 50,891        | 34,469        | 0.404           | 44            | 163           | 0.787           | 4.71E-29    | 5.469            | TRUE                      | 3.226         |
| Drex    | 83,443        | 56,945        | 0.406           | 90            | 492           | 0.845           | 9.05E-106   | 8.009            | TRUE                      | 5.178         |
| Cint    | 17,822        | 10,891        | 0.379           | 142           | 91            | 0.391           | 7.35E-01    | 1.049            | FALSE                     | 3.551         |
| Brabel  | 73,944        | 51,779        | 0.412           | 61            | 545           | 0.899           | 1.98E-139   | 12.759           | TRUE                      | 4.208         |
| Spur2   | 25,658        | 17,523        | 0.406           | 182           | 173           | 0.487           | 1.97E-03    | 1.392            | TRUE                      | 5.343         |
| Dmel    | 15,175        | 8,875         | 0.369           | 21            | 126           | 0.857           | 4.44E-34    | 10.257           | TRUE                      | 2.457         |
| Cele    | 39,278        | 25,282        | 0.392           | 46            | 153           | 0.769           | 5.48E-27    | 5.167            | TRUE                      | 2.724         |
| Cgig    | 47,913        | 33,256        | 0.410           | 32            | 189           | 0.855           | 2.44E-42    | 8.508            | TRUE                      | 2.116         |
| Ctel    | 39,746        | 26,339        | 0.399           | 27            | 172           | 0.864           | 6.02E-42    | 9.612            | TRUE                      | 1.321         |
| Sman    | 16,627        | 10,820        | 0.394           | 65            | 44            | 0.404           | 8.45E-01    | 1.040            | FALSE                     | 4.289         |
| Tadh    | NA            | NA            | NA              | NA            | NA            | NA              | NA          | NA               | NA                        | 0.174         |
| Hmag    | 34,551        | 24,141        | 0.411           | 61            | 53            | 0.465           | 2.54E-01    | 1.244            | FALSE                     | 1.641         |
| Nvex    | 32,468        | 21,892        | 0.403           | 25            | 37            | 0.597           | 2.61E-03    | 2.195            | TRUE                      | 1.284         |
| Aipt    | 32,474        | 23,339        | 0.418           | 5             | 32            | 0.865           | 2.70E-08    | 8.904            | TRUE                      | 0.420         |
| Mlei    | 22,738        | 13,899        | 0.379           | 15            | 60            | 0.800           | 1.35E-13    | 6.543            | TRUE                      | 0.953         |
| Aque    | 37,387        | 28,475        | 0.432           | 7             | 19            | 0.731           | 2.56E-03    | 3.564            | TRUE                      | 0.252         |
| Ocar    | NA            | NA            | NA              | NA            | NA            | NA              | NA          | NA               | NA                        | 0.108         |
| Scil    | 27,546        | 20,598        | 0.428           | 8             | 16            | 0.667           | 2.24E-02    | 2.675            | FALSE                     | 0.326         |
| Sros    | NA            | NA            | NA              | NA            | NA            | NA              | NA          | NA               | NA                        | 0.069         |
| Cowc    | NA            | NA            | NA              | NA            | NA            | NA              | NA          | NA               | NA                        | 0.103         |
| Cfra    | 26,557        | 16,135        | 0.378           | 11            | 10            | 0.476           | 3.74E-01    | 1.496            | FALSE                     | 0.897         |
| Sar3    | 24,111        | 14,136        | 0.370           | 33            | 21            | 0.389           | 7.79E-01    | 1.085            | FALSE                     | 1.823         |
| Nk52    | NA            | NA            | NA              | NA            | NA            | NA              | NA          | NA               | NA                        | 0.040         |
| Ncix    | NA            | NA            | NA              | NA            | NA            | NA              | NA          | NA               | NA                        | 0.051         |
| Spom    | NA            | NA            | NA              | NA            | NA            | NA              | NA          | NA               | NA                        | 0.097         |
| Aory    | NA            | NA            | NA              | NA            | NA            | NA              | NA          | NA               | NA                        | 0.000         |
| Cneo    | NA            | NA            | NA              | NA            | NA            | NA              | NA          | NA               | NA                        | 0.086         |
| Umay    | NA            | NA            | NA              | NA            | NA            | NA              | NA          | NA               | NA                        | 0.000         |
| Tmel    | NA            | NA            | NA              | NA            | NA            | NA              | NA          | NA               | NA                        | 0.147         |
| Rory    | NA            | NA            | NA              | NA            | NA            | NA              | NA          | NA               | NA                        | 0.023         |
| Amac    | NA            | NA            | NA              | NA            | NA            | NA              | NA          | NA               | NA                        | 0.016         |
| Spun    | NA            | NA            | NA              | NA            | NA            | NA              | NA          | NA               | NA                        | 0.034         |
| Rirr    | NA            | NA            | NA              | NA            | NA            | NA              | NA          | NA               | NA                        | 0.164         |
| Ccor    | NA            | NA            | NA              | NA            | NA            | NA              | NA          | NA               | NA                        | 0.009         |
| Gpro    | NA            | NA            | NA              | NA            | NA            | NA              | NA          | NA               | NA                        | 0.029         |
| Falb    | NA            | NA            | NA              | NA            | NA            | NA              | NA          | NA               | NA                        | 0.000         |
| Ddis2   | NA            | NA            | NA              | NA            | NA            | NA              | NA          | NA               | NA                        | 0.038         |
| Ppal    | NA            | NA            | NA              | NA            | NA            | NA              | NA          | NA               | NA                        | 0.000         |
| Acas    | NA            | NA            | NA              | NA            | NA            | NA              | NA          | NA               | NA                        | 0.033         |
| Atha    | 41,711        | 34,760        | 0.455           | 12            | 14            | 0.538           | 4.34E-01    | 1.400            | FALSE                     | 0.430         |
| Vvin    | 30,997        | 25,861        | 0.455           | 40            | 24            | 0.375           | 2.11E-01    | 0.719            | FALSE                     | 1.129         |
| Mgut    | 37,698        | 30,905        | 0.450           | 26            | 18            | 0.409           | 6.51E-01    | 0.844            | FALSE                     | 0.536         |
| Osat2   | 20,512        | 17,011        | 0.453           | 9             | 4             | 0.308           | 4.06E-01    | 0.536            | FALSE                     | 0.196         |
| Ppat    | 31,325        | 26,355        | 0.457           | 66            | 26            | 0.283           | 7.41E-04    | 0.468            | TRUE                      | 1.193         |
| Marpol  | 27,565        | 23,600        | 0.461           | 57            | 68            | 0.544           | 7.22E-02    | 1.393            | FALSE                     | 2.027         |
| Smoe    | NA            | NA            | NA              | NA            | NA            | NA              | NA          | NA               | NA                        | 0.014         |
| Kfla    | 27,106        | 21,987        | 0.448           | 11            | 14            | 0.560           | 3.16E-01    | 1.569            | FALSE                     | 0.435         |
| Vcar    | 30,591        | 23,880        | 0.438           | 41            | 38            | 0.481           | 4.96E-01    | 1.187            | FALSE                     | 2.955         |
| Crei    | NA            | NA            | NA              | NA            | NA            | NA              | NA          | NA               | NA                        | 0.333         |
| Mpus    | NA            | NA            | NA              | NA            | NA            | NA              | NA          | NA               | NA                        | 0.131         |
| Cpar    | NA            | NA            | NA              | NA            | NA            | NA              | NA          | NA               | NA                        | 0.027         |
| Gthe    | NA            | NA            | NA              | NA            | NA            | NA              | NA          | NA               | NA                        | 0.056         |
| Esil    | 36,113        | 36,546        | 0.503           | 25            | 26            | 0.510           | 1.00E+00    | 1.028            | FALSE                     | 1.291         |
| Pinf    | NA            | NA            | NA              | NA            | NA            | NA              | NA          | NA               | NA                        | 0.034         |
| Aano    | NA            | NA            | NA              | NA            | NA            | NA              | NA          | NA               | NA                        | 0.017         |
| Pfal2   | NA            | NA            | NA              | NA            | NA            | NA              | NA          | NA               | NA                        | 0.411         |
| Tthe    | 16,539        | 12,056        | 0.422           | 3             | 12            | 0.800           | 3.57E-03    | 5.488            | TRUE                      | 0.194         |
| BnatMEA | 60,592        | 38,185        | 0.387           | 41            | 29            | 0.414           | 6.26E-01    | 1.122            | FALSE                     | 1.189         |
| Ehux    | NA            | NA            | NA              | NA            | NA            | NA              | NA          | NA               | NA                        | 0.013         |
| Ngru    | NA            | NA            | NA              | NA            | NA            | NA              | NA          | NA               | NA                        | 0.019         |

NA=less than 10 exons in any group; discarded

**Fig S12 (continued).** Enrichment in 3n-divisibility of exon lengths in ES events, measured with Fisher's exact test. Includes data from:

- (A) whole transcriptomes ('all')
- (B) a sub-set of above-median gene expression and length ('high constraint' or 'HC' dataset)
- (C) a sub-set with high ES frequency.

A) Fraction of 3n introns with IR, exons with ES, and exons with ES vs. % ES-positive genes, for selected animal and plant tissues

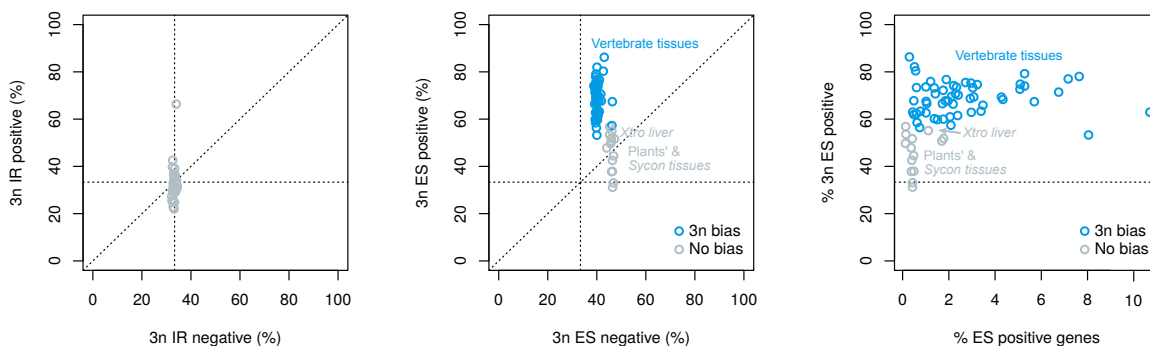

B) Correlation of ES events and gene architecture, including pooled transcriptomes and tissue-level transcriptomes for selected animals and plants

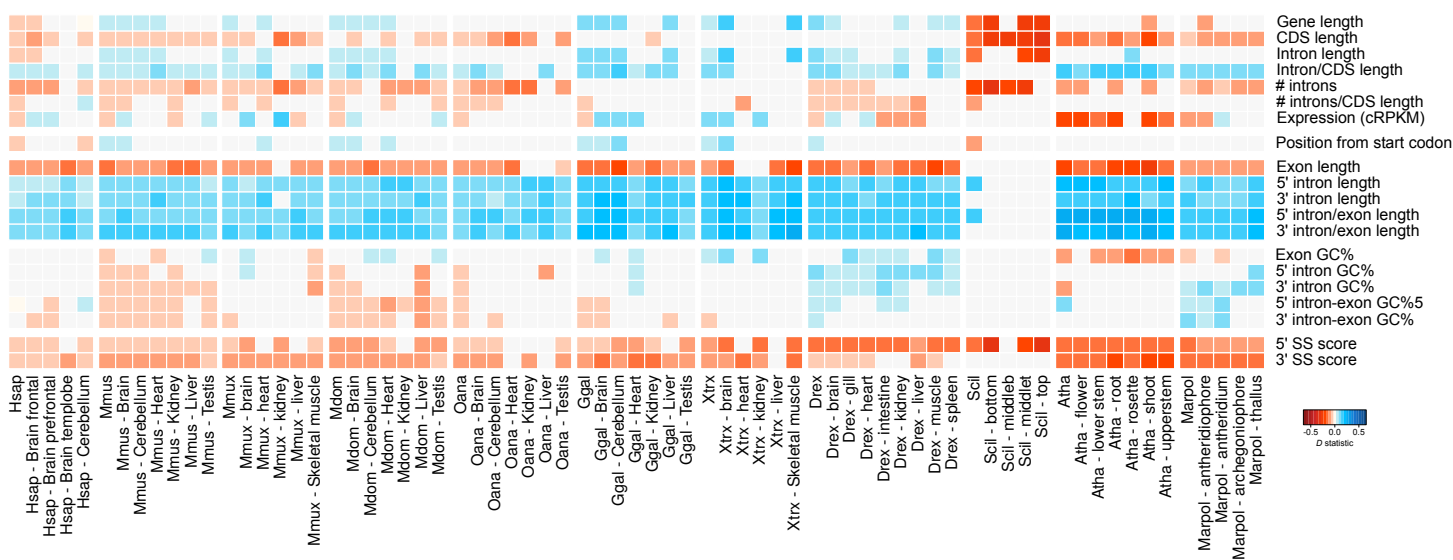

C) Correlation of IR events and gene architecture, including pooled transcriptomes and tissue-level transcriptomes for selected animals and plants

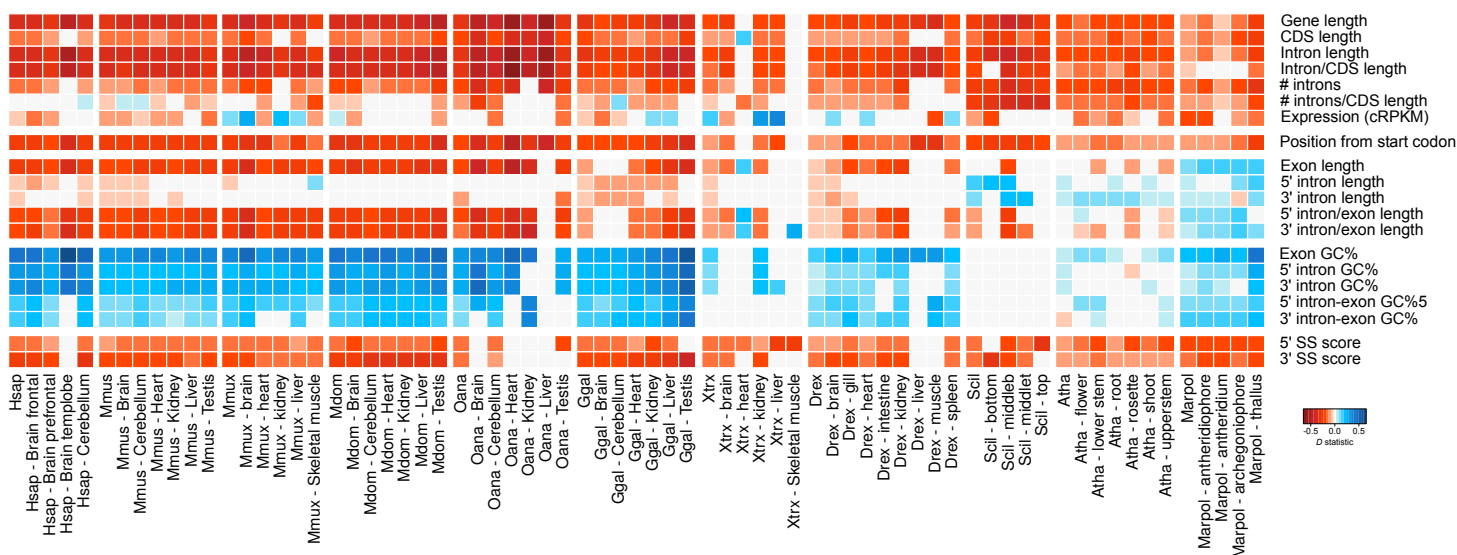

**Fig S13.** Tissue-level analysis of gene architectural effects on AS, using samples from selected animals (*H. sapiens*, 2x *M. musculus*, *M. domestica*, *O. anatinus*, *G. gallus*, *X. tropicalis*, *D. rerio*, *S. ciliatum*) and plants (*A. thaliana* and *M. polymorpha*).

A) Fraction of 3-divisible introns and exons involved in AS events (as in Figure 3).

B) Relationship between ES and gene architectural traits, as in Figure 4.

C) Relationship between IR and gene architectural traits, as in Figure 5.

Each heatmap represents the distance between distributions of gene architecture values for ES- or IR-positive and -negative exons or introns, measured with the D statistic of the one-sided Kolmogorov-Smirnov two-sample test (significant if  $p < 0.01$ ; otherwise grey). D values are recorded as positive/negative (blue/red) according to two one-sided Kolmogorov-Smirnov tests with complementary alternative hypotheses: positive/negative D (blue/red) reflects a positive/negative relationship between ES or IR and the given feature.

**A)** Fraction of 3n introns with IR, exons with ES, and exons with ES vs. % ES-positive genes, transcriptome at 2x sequencing depth

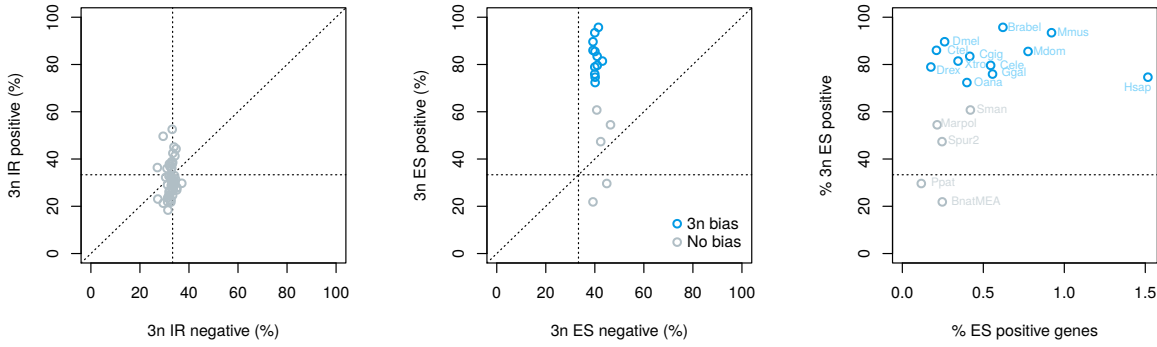

**C)** Fraction of 3n introns with IR, exons with ES, and exons with ES vs. % ES-positive genes, transcriptome at 5x sequencing depth

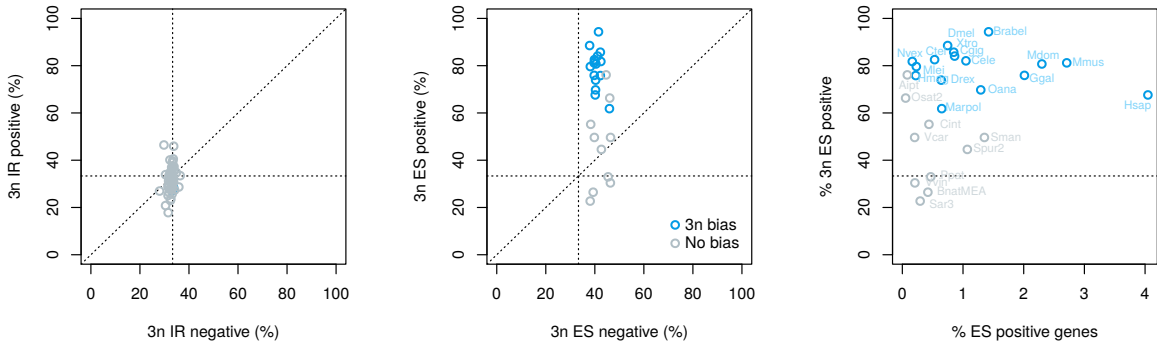

**C)** Fraction of 3n introns with IR, exons with ES, and exons with ES vs. % ES-positive genes, transcriptome at 10x sequencing depth

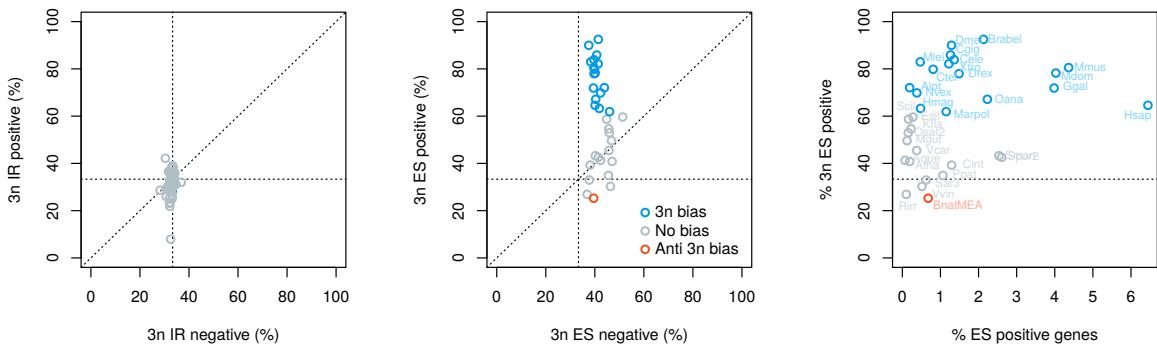

**D)** Fraction of 3n introns with IR, exons with ES, and exons with ES vs. % ES-positive genes, transcriptome at 15x sequencing depth

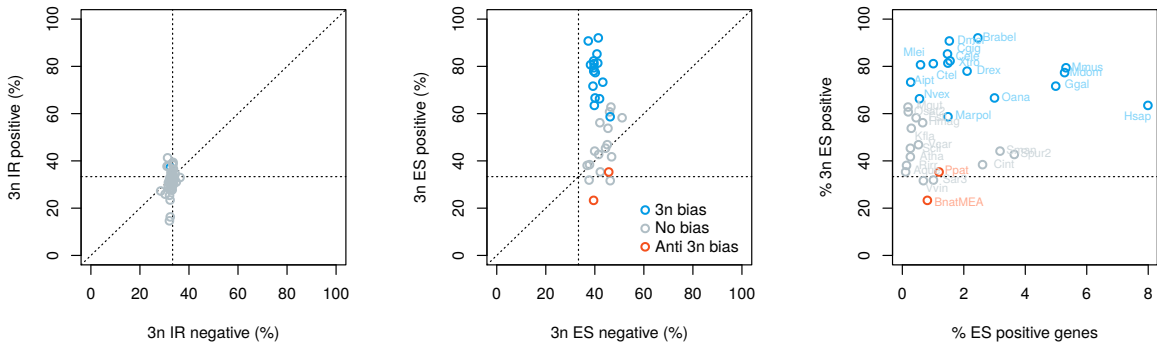

**Fig S14.** Fraction of 3-divisible introns and exons involved in AS events (as in Figure 3), downsampling each RNA-seq sample at 2x (A), 5x (B), 10x (C), and 15x (D).

In each case, we report 1) % of introns with 3-divisible lengths that were classified as IR-positive (x-axis) and IR-negative (y-axis), 2) % exons with 3-divisible lengths that were classified as ES-negative (x-axis) and ES-negative (y-axis) in each species with >10 ES-positive exons; 3) ES-positive exons that are 3n (y-axis) with respect to the percentage of genes with ES-positive exons (x-axis), per species.







A) Correlation of ES events and gene architecture, transcriptome at 2x sequencing depth

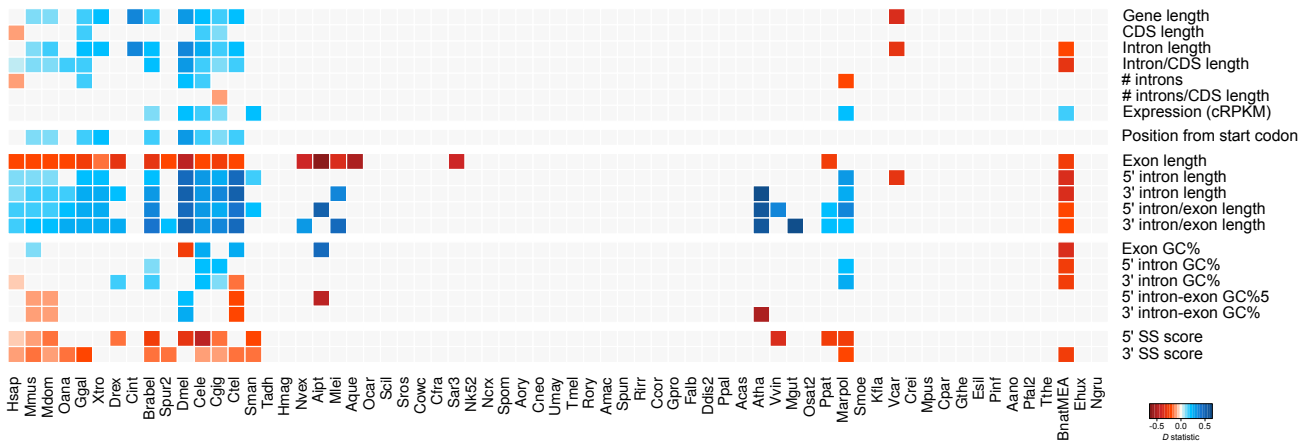

C) Correlation of ES events and gene architecture, transcriptome at 5x sequencing depth

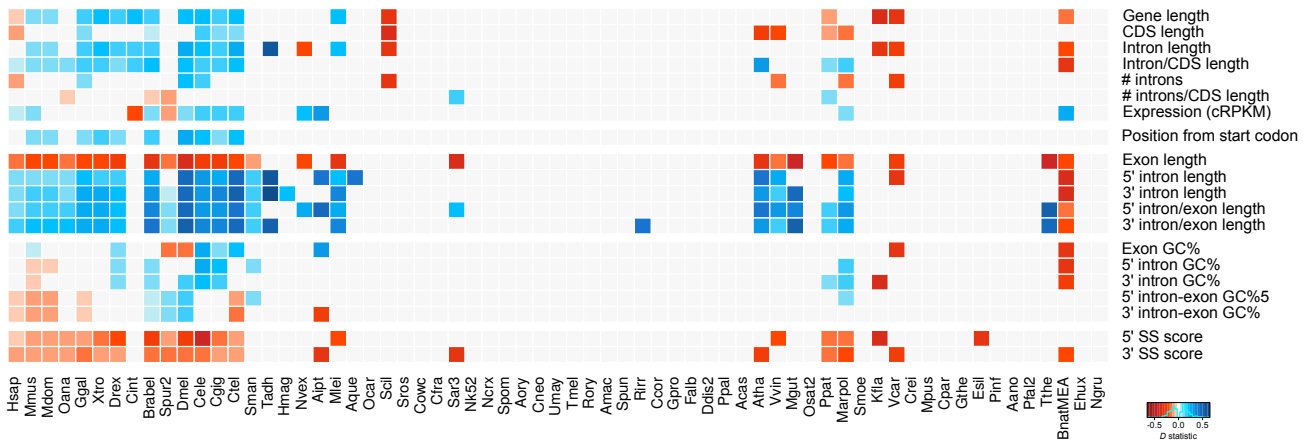

C) Correlation of ES events and gene architecture, transcriptome at 10x sequencing depth

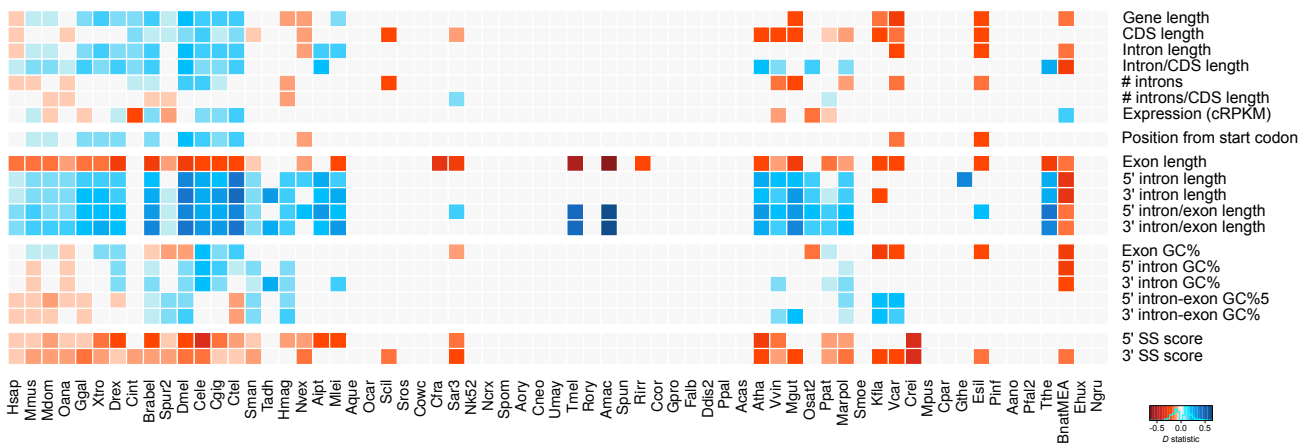

D) Correlation of ES events and gene architecture, transcriptome at 15x sequencing depth

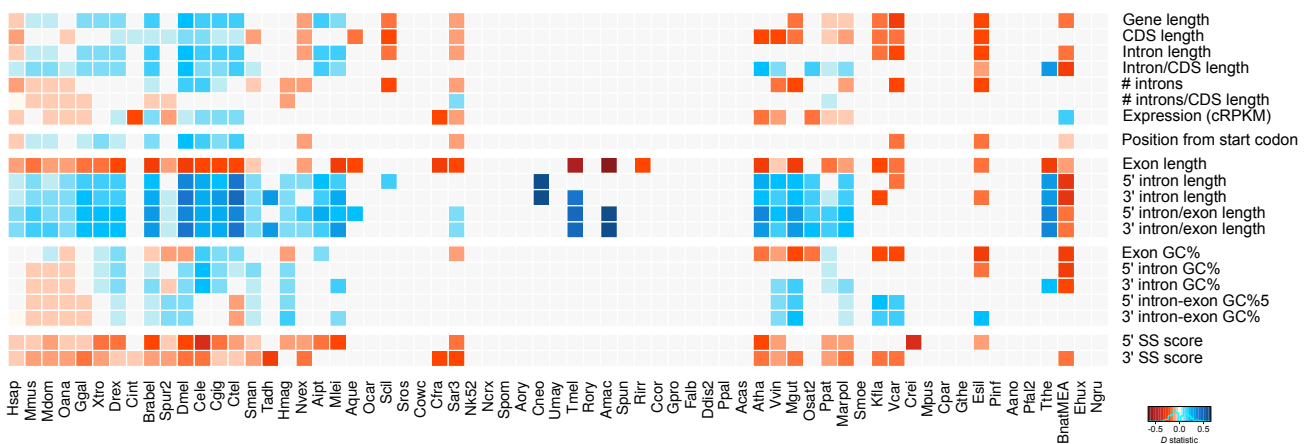

**Fig S17.** Relationship between gene structure and sequence composition and ES (as in Figure 4), downsampling each RNA-seq sample at 2x (A), 5x (B), 10x (C), and 15x (D).

Each heatmap represents the distance between distributions of gene architecture values for ES-positive and ES-negative exons, measured with the D statistic of the one-sided Kolmogorov-Smirnov two-sample test (significant if  $p < 0.01$ ; otherwise grey). D values are recorded as positive/negative (blue/red) according to two one-sided Kolmogorov-Smirnov tests with complementary alternative hypotheses: positive/negative D (blue/red) reflects a positive/negative relationship between ES and the given feature.

A) Correlation of IR events and gene architecture, transcriptome at 2x sequencing depth

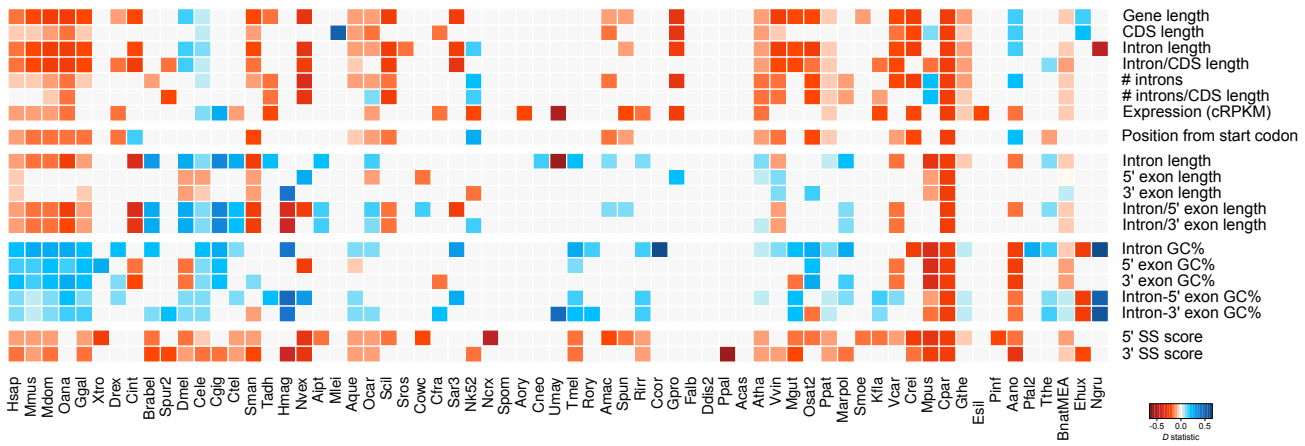

C) Correlation of IR events and gene architecture, transcriptome at 5x sequencing depth

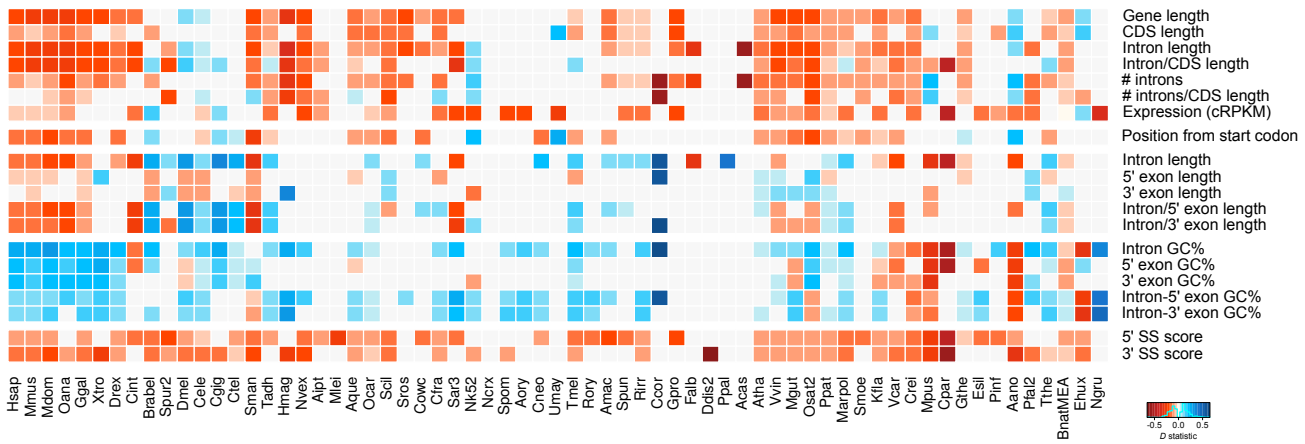

C) Correlation of IR events and gene architecture, transcriptome at 10x sequencing depth

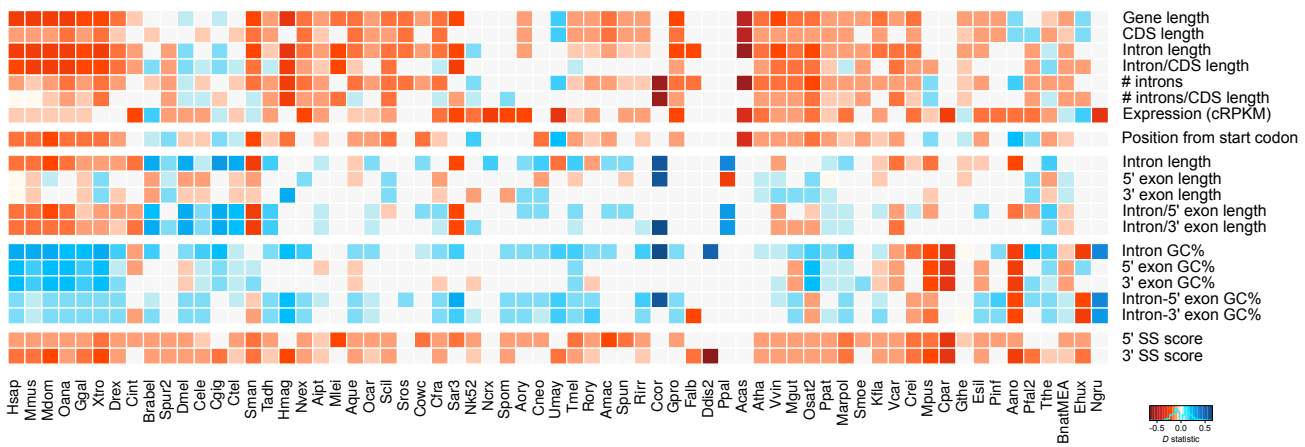

D) Correlation of IR events and gene architecture, transcriptome at 15x sequencing depth

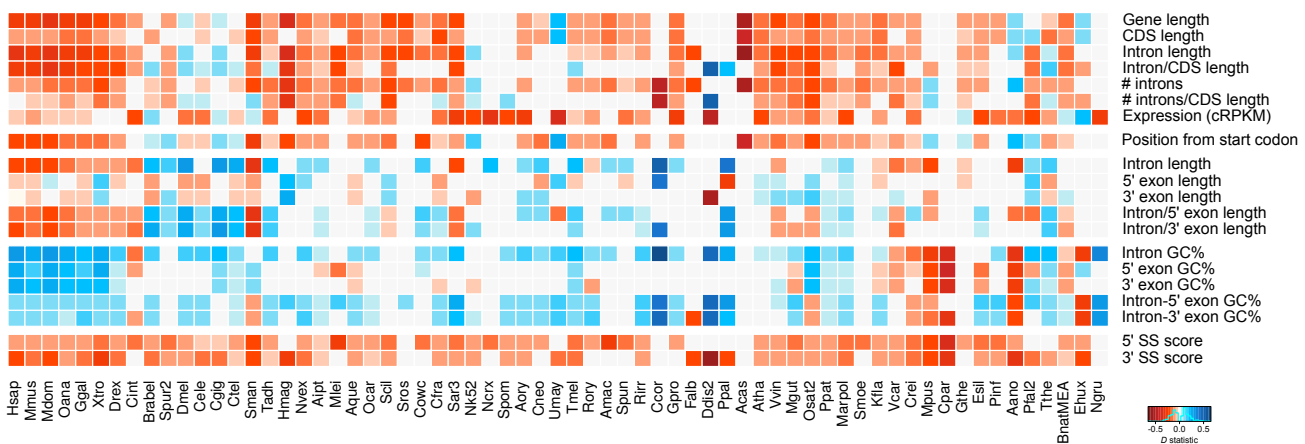

**Fig S18.** Relationship between gene structure and sequence composition and IR (as in Figure 5), downsampling each RNA-seq sample at 2x (A), 5x (B), 10x (C), and 15x (D).

Each heatmap represents the distance between distributions of gene architecture values for IR-positive and IR-negative introns, measured with the D statistic of the one-sided Kolmogorov-Smirnov two-sample test (significant if  $p < 0.01$ ; otherwise grey). D values are recorded as positive/negative (blue/red) according to two one-sided Kolmogorov-Smirnov tests with complementary alternative hypotheses: positive/negative D (blue/red) reflects a positive/negative relationship between IR and the given feature.

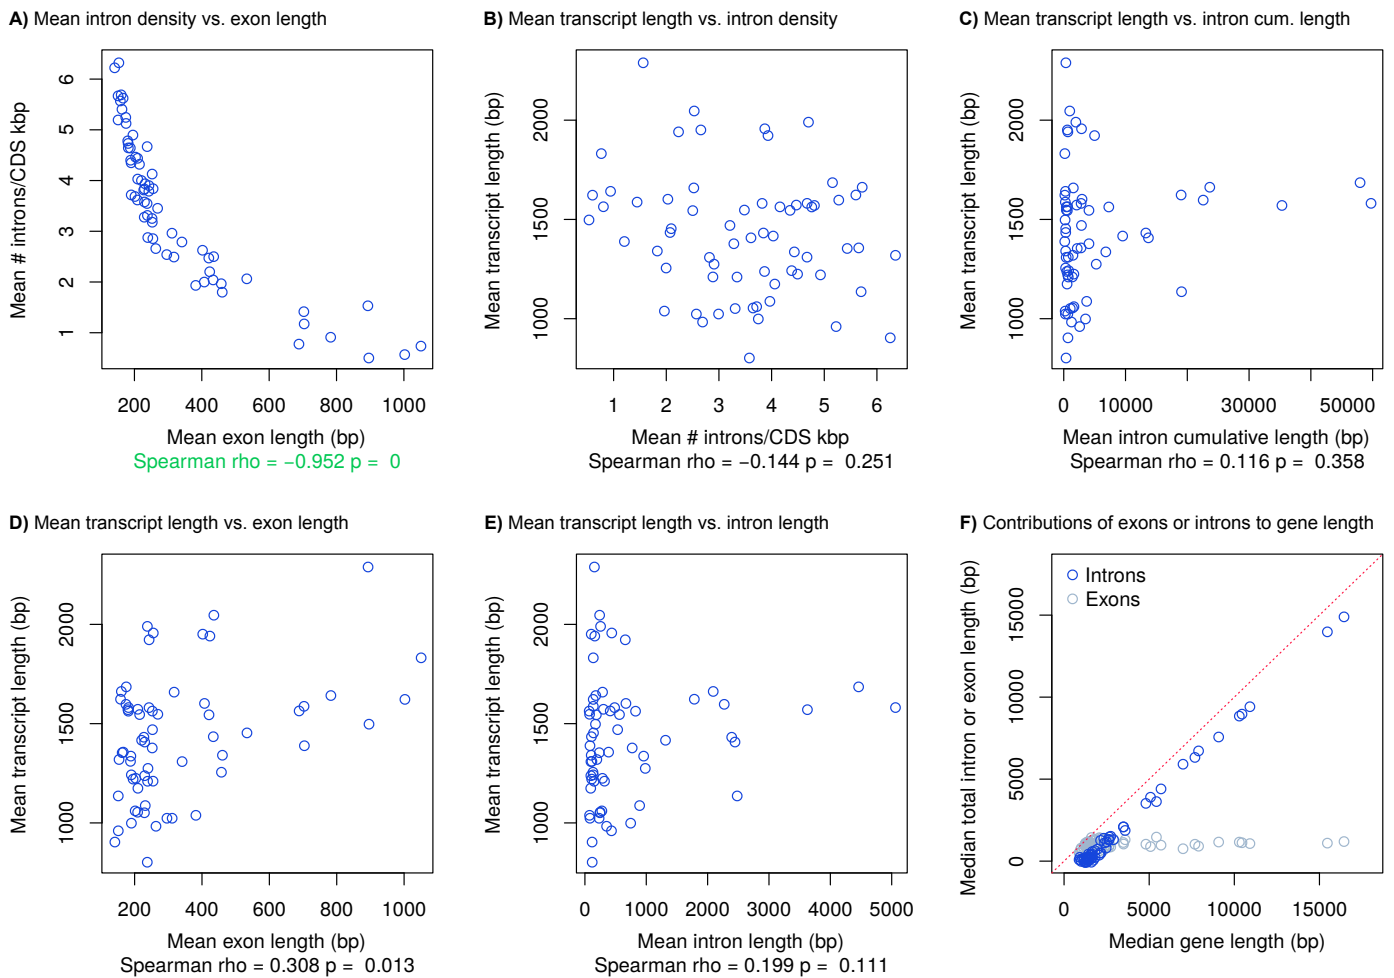

**Fig S19.** Signatures of intron gain processes in the genome architecture of 65 eukaryotic species.

- A) Correlation of mean exon length (bp) and mean intron density (measured as introns/CDS kbp).
- B) Correlation of mean intron density (measured as introns/CDS kbp) and mean transcript length (bp).
- C) Correlation of mean intron cumulative length (all introns within gene, in bp) and mean transcript length (bp).
- D) Correlation of mean exon length (bp) and mean transcript length (bp).
- E) Correlation of mean intron length (bp) and mean transcript length (bp).
- F) Contribution of cumulative exon and intron lengths to gene length (using median values).

For plots A-E, rho parameter and p-value of Spearman's rank correlation test are indicated. Note that all correlations are non-significant (at the  $p < 0.01$  level) except for exon length and intron density (panel A). This plot indicates that transcript size remains relatively constant across eukaryotes and does not increase in organisms that have undergone more intron gains (panel B). On the other hand, as new introns are inserted in transcripts of quasi-constant mean length, exons become distinctly shorter (panel A).

| species | Architectural feature | Spearman correlation pval | Rho statistic |
|---------|-----------------------|---------------------------|---------------|
| Hsap    | crpkm                 | 5.36E-84                  | -0.2413       |
| Hsax    | crpkm                 | 2.53E-188                 | -0.1878       |
| Mmus    | crpkm                 | 9.28E-32                  | -0.1138       |
| Mmux    | crpkm                 | 2.60E-36                  | -0.2209       |
| Mdom    | crpkm                 | 3.63E-30                  | -0.1670       |
| Oana    | crpkm                 | 4.69E-02                  | -0.0755       |
| Ggal    | crpkm                 | 1.81E-55                  | -0.2257       |
| Xtro    | crpkm                 | 8.07E-01                  | 0.0074        |
| Xtrx    | crpkm                 | 2.09E-25                  | -0.2413       |
| Drex    | crpkm                 | 6.13E-01                  | 0.0088        |
| Drer    | crpkm                 | 1.83E-08                  | -0.1736       |
| Cint    | crpkm                 | 2.09E-12                  | -0.3077       |
| Bflo    | crpkm                 | 4.36E-03                  | -0.1309       |
| Spur2   | crpkm                 | 4.56E-07                  | -0.2382       |
| Dmel    | crpkm                 | 2.43E-85                  | -0.2300       |
| Dmel2   | crpkm                 | 2.58E-03                  | -0.0878       |
| Cele    | crpkm                 | 0.00E+00                  | -0.2796       |
| Cgig    | crpkm                 | 9.62E-02                  | 0.0432        |
| Ctel    | crpkm                 | 1.15E-03                  | -0.0544       |
| Sman    | crpkm                 | 9.18E-22                  | -0.2332       |
| Tadh    | crpkm                 | 2.52E-29                  | -0.3873       |
| Hmag    | crpkm                 | 3.67E-01                  | -0.0547       |
| Nvec    | crpkm                 | 3.24E-131                 | -0.4115       |
| Nvex    | crpkm                 | 7.43E-05                  | 0.0812        |
| Aipt    | crpkm                 | 4.56E-67                  | -0.3963       |
| Mlei    | crpkm                 | 8.11E-01                  | -0.0181       |
| Aque    | crpkm                 | 1.11E-86                  | -0.2950       |
| Ocar    | crpkm                 | 5.26E-18                  | -0.2139       |
| Scil    | crpkm                 | 3.44E-37                  | -0.4087       |
| Sros    | crpkm                 | 6.27E-06                  | -0.3244       |
| Cowc    | crpkm                 | 4.51E-02                  | -0.0562       |
| Cfra    | crpkm                 | 2.06E-60                  | -0.2939       |
| Sar3    | crpkm                 | 1.09E-20                  | -0.3590       |
| Nk52    | crpkm                 | 6.20E-21                  | -0.2852       |
| Ncrx    | crpkm                 | 3.99E-06                  | -0.1911       |
| Spom    | crpkm                 | 3.34E-12                  | -0.2235       |
| Aory    | crpkm                 | 3.12E-28                  | -0.4089       |
| Cneo    | crpkm                 | 2.07E-16                  | -0.3309       |
| Umay    | crpkm                 | 1.99E-11                  | -0.3438       |
| Tmel    | crpkm                 | 4.77E-02                  | -0.0396       |
| Rory    | crpkm                 | 7.76E-17                  | -0.2076       |
| Amac    | crpkm                 | 2.39E-05                  | -0.2320       |
| Spun    | crpkm                 | 1.71E-33                  | -0.4273       |
| Rirr    | crpkm                 | 1.44E-41                  | -0.3523       |
| Rirr2   | crpkm                 | 1.92E-05                  | -0.5855       |
| Ccor    | crpkm                 | 9.48E-01                  | -0.0096       |
| Gpro    | crpkm                 | 6.01E-15                  | -0.2849       |
| Falb    | crpkm                 | 1.14E-03                  | -0.3323       |
| Ddis2   | crpkm                 | 1.12E-01                  | -0.2519       |
| Ppal    | crpkm                 | 3.57E-02                  | -0.1777       |
| Acas    | crpkm                 | 8.00E-02                  | -0.2838       |
| Atha    | crpkm                 | 7.51E-20                  | 0.1186        |
| Atha3   | crpkm                 | 8.25E-08                  | -0.1607       |
| Vvin    | crpkm                 | 1.80E-52                  | -0.2406       |
| Mgut    | crpkm                 | 4.90E-07                  | -0.1147       |
| Osat2   | crpkm                 | 2.43E-19                  | -0.3509       |
| Ppat    | crpkm                 | 1.38E-134                 | -0.3727       |
| Smoe    | crpkm                 | 4.58E-01                  | -0.0379       |
| Kfla    | crpkm                 | 3.37E-05                  | -0.0951       |
| Vcar    | crpkm                 | 1.60E-01                  | -0.0159       |
| Crei    | crpkm                 | 7.25E-13                  | -0.1689       |
| Mpus    | crpkm                 | 1.25E-04                  | -0.1552       |
| Cpar    | crpkm                 | 5.05E-03                  | -0.3014       |
| Gthe    | crpkm                 | 6.34E-27                  | -0.1286       |
| GtheME  | crpkm                 | 7.74E-55                  | -0.3847       |
| Esil    | crpkm                 | 3.70E-20                  | -0.1812       |
| Pinf    | crpkm                 | 7.40E-17                  | -0.2557       |
| Aano    | crpkm                 | 2.55E-10                  | -0.2615       |
| Pfal2   | crpkm                 | 3.90E-04                  | -0.0925       |
| Tthe    | crpkm                 | 2.41E-57                  | -0.3247       |
| BnatMEA | crpkm                 | 2.89E-14                  | -0.0652       |
| Bnat    | crpkm                 | 8.10E-103                 | -0.3806       |
| Bnao    | crpkm                 | 4.37E-67                  | -0.2128       |
| Ehux    | crpkm                 | 5.14E-01                  | 0.0336        |
| Ngru    | crpkm                 | 1.15E-06                  | -0.3426       |
| Marpol  | crpkm                 | 1.96E-19                  | -0.1559       |
| Brabel  | crpkm                 | 1.51E-01                  | 0.0230        |

Spearman correlation between IR levels in IR-positive introns and crpkm  
Negative rho=negative association  
Significant if p<0.01

**Fig S20.** Correlation analysis of IR and expression rates among IR-positive events, with Spearman correlation test.

A) Conservation of the core spliceosomal toolkit across eukaryotes

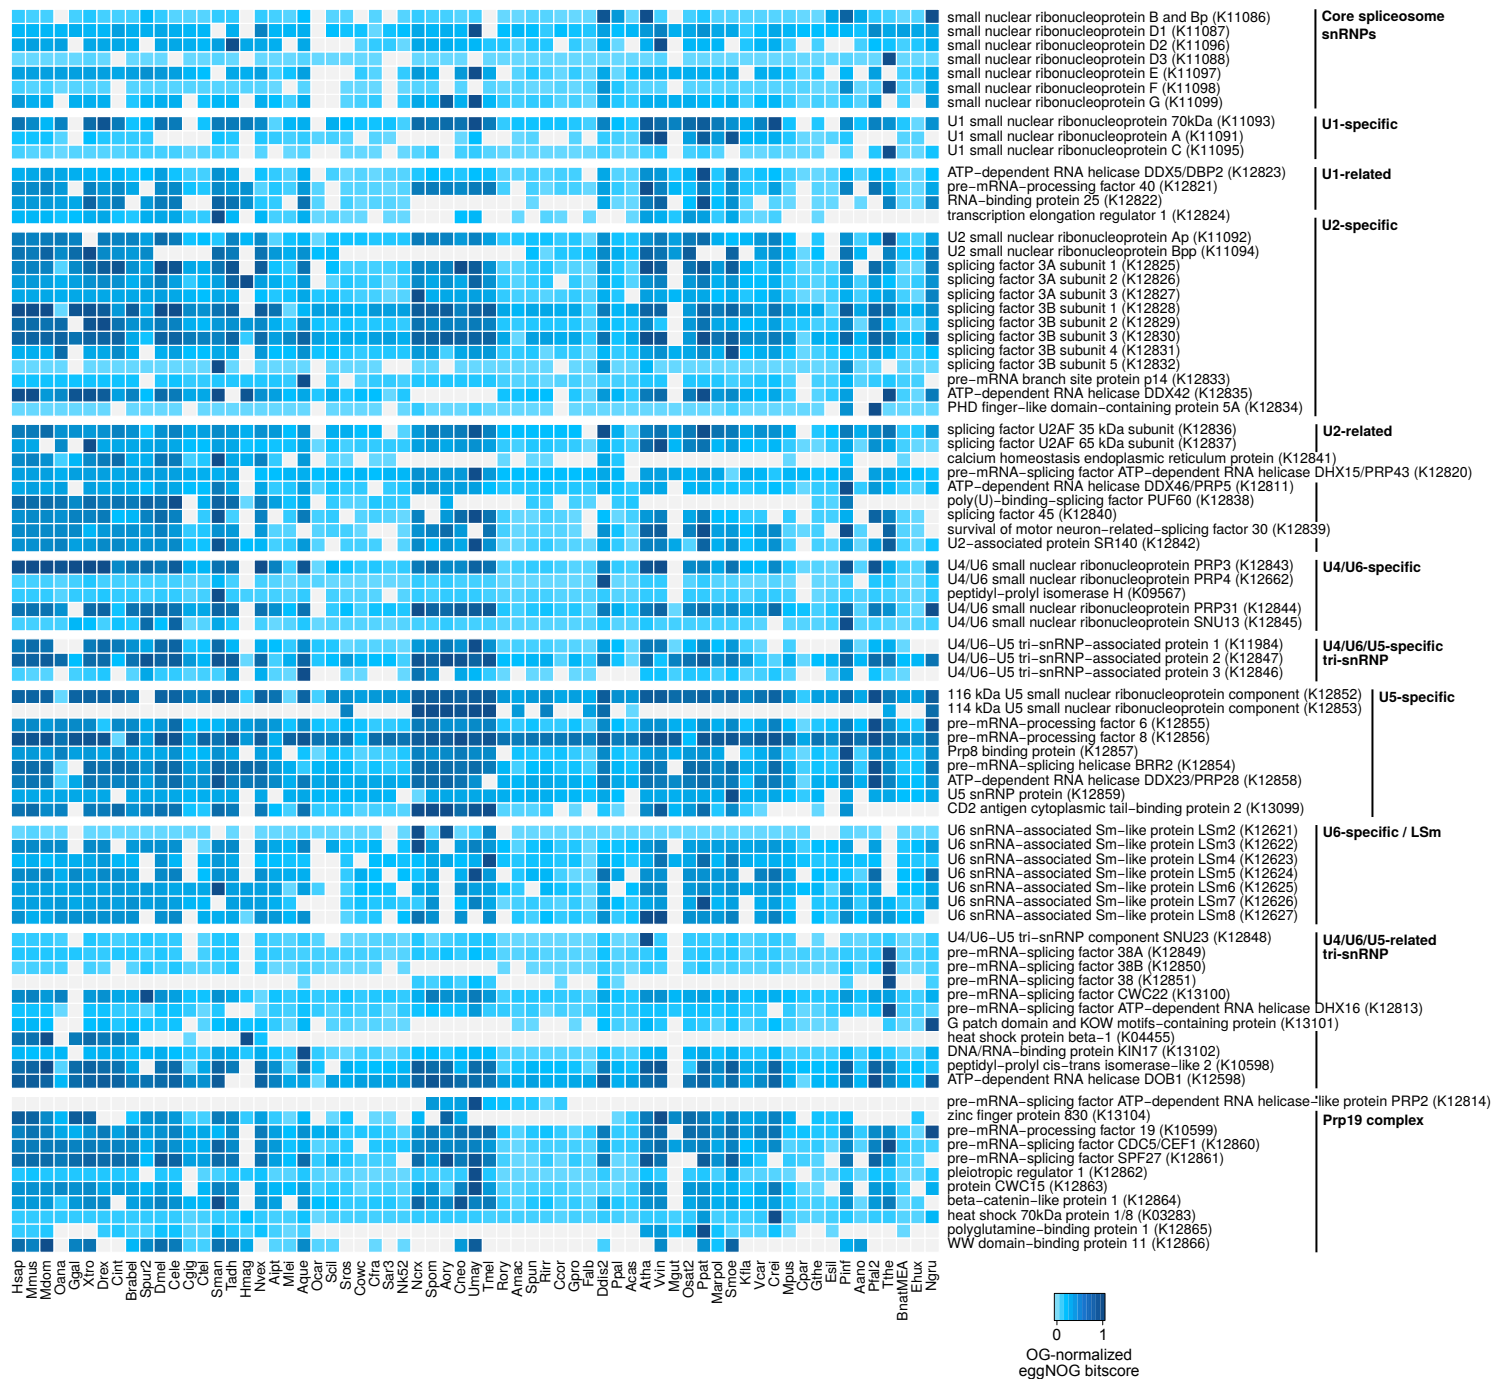

B) IR frequency and spliceosome relative expression

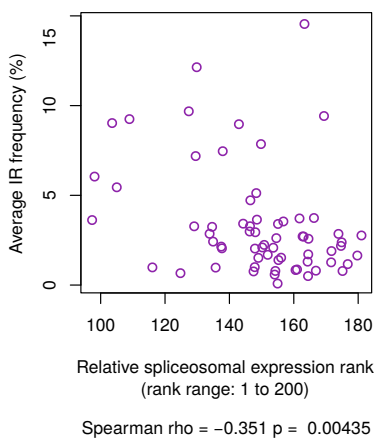

C) ES frequency and spliceosome relative expression

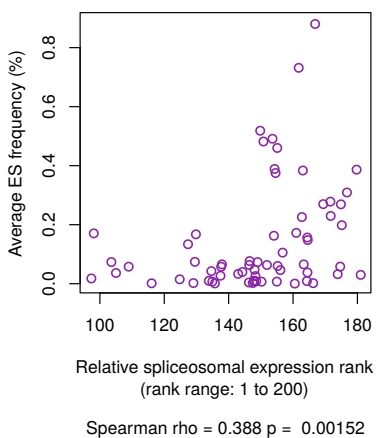

D) Intron density and spliceosome relative expression

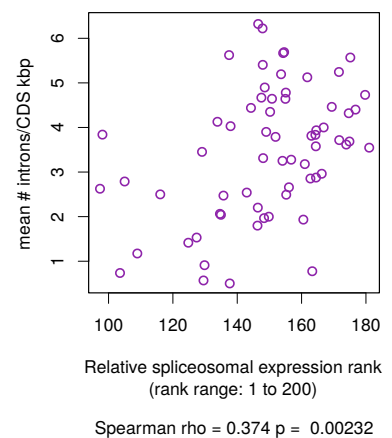

**Fig S21.** Evolutionary conservation of the core spliceosome.

A) Heatmap representing presence/absence of core spliceosomal genes across eukaryotes, as identified by eggNOG mapper and KEGG orthologous groups (KEGG codes in brackets). Blue shadings indicate ortholog presence, and a color-scale has been added to indicate the OG-normalized bitscore value as obtained in eggNOG.

B) Correlation between average IR frequencies (as in Supplementary Figure S6) and the relative rank of expression of the spliceosomal genes, per species.

C) Correlation between average ES frequencies (as in Figure 2) and the relative rank of expression of the spliceosomal genes, per species.

D) Correlation between intron content (introns/CDS kbp) and the relative rank of expression of the spliceosomal genes, per species.

See Methods for details on the calculation of relative rank of expression.

**Coefficients summary and significance (Wald test)**

| Variable    | Estimate  | Std. Error | z statistic<br>(Wald test) | P-value<br>(Wald test) |
|-------------|-----------|------------|----------------------------|------------------------|
| (Intercept) | 6.00E+00  | 2.63E-01   | 22.80                      | 4.56E-115              |
| lengene     | 2.46E-06  | 6.16E-07   | 3.99                       | 6.60E-05               |
| lencds      | 2.81E-05  | 1.04E-05   | 2.71                       | 6.79E-03               |
| ralncd      | 8.14E-03  | 1.86E-03   | 4.36                       | 1.28E-05               |
| numin       | -8.92E-03 | 2.35E-03   | -3.80                      | 1.43E-04               |
| ranincd     | -2.88E-02 | 8.63E-03   | -3.33                      | 8.60E-04               |
| lenex       | -6.90E-05 | 6.55E-05   | -1.05                      | 2.92E-01               |
| lenin1      | -5.44E-06 | 8.57E-06   | -0.64                      | 5.25E-01               |
| lenin2      | -5.18E-05 | 1.03E-05   | -5.02                      | 5.20E-07               |
| ralinex1    | 6.30E-03  | 1.00E-03   | 6.28                       | 3.40E-10               |
| ralinex2    | 1.41E-02  | 1.21E-03   | 11.69                      | 1.51E-31               |
| ss5score    | -3.98E-01 | 1.94E-02   | -20.50                     | 2.27E-93               |
| ss3score    | -5.91E-01 | 3.45E-02   | -17.12                     | 1.12E-65               |
| is3n        | 8.86E-01  | 3.23E-02   | 27.41                      | 2.36E-165              |

**ANOVA deviance table (variables added sequentially)**

| Variable | Df | Deviance | Resid. Df | Resid. Dev | Pr(>Chi)  |
|----------|----|----------|-----------|------------|-----------|
| NULL     | NA | NA       | 18635     | 25834.98   | NA        |
| lengene  | 1  | 898.05   | 18634     | 24936.93   | 2.60E-197 |
| lencds   | 1  | 18.93    | 18633     | 24918.00   | 1.35E-05  |
| lenints  | 0  | 0.00     | 18633     | 24918.00   | NA        |
| ralncd   | 1  | 157.51   | 18632     | 24760.49   | 3.97E-36  |
| numin    | 1  | 26.33    | 18631     | 24734.16   | 2.87E-07  |
| ranincd  | 1  | 7.27     | 18630     | 24726.89   | 7.03E-03  |
| lenex    | 1  | 38.66    | 18629     | 24688.24   | 5.05E-10  |
| lenin1   | 1  | 54.61    | 18628     | 24633.63   | 1.47E-13  |
| lenin2   | 1  | 81.37    | 18627     | 24552.26   | 1.87E-19  |
| ralinex1 | 1  | 249.31   | 18626     | 24302.95   | 3.67E-56  |
| ralinex2 | 1  | 183.87   | 18625     | 24119.08   | 6.91E-42  |
| ss5score | 1  | 475.83   | 18624     | 23643.25   | 1.73E-105 |
| ss3score | 1  | 334.52   | 18623     | 23308.73   | 9.95E-75  |
| is3n     | 1  | 761.47   | 18622     | 22547.26   | 1.29E-167 |

**NULL deviance** 25834.98171

**Model deviance** 22547.2616

**Gene features**

|          |                                      |
|----------|--------------------------------------|
| lengene  | gene length                          |
| lencds   | CDS length                           |
| ralncd   | ration intron length/CDS length      |
| ranincd  | number of introns/CDS length         |
| lenex    | exon length                          |
| lenin1   | 5' intron length                     |
| lenin2   | 3' intron length                     |
| ralinex1 | 5' intron length/exon length         |
| ralinex2 | 3' intron length/exon length         |
| ss5score | 5' SS heterogeneity score            |
| ss3score | 3' SS heterogeneity score            |
| is3n     | boolean: is exon length 3-divisible? |

**Species list Total=24**

Mmus  
Mdom  
Ggal  
Xtro  
Drex  
Brabel  
Dmel  
Cele  
Cgig  
Ctel  
Hmag  
Nvex  
Aipt  
Mlei  
Aque  
Scil  
Cfra  
Sar3  
Atha  
Vvin  
Mgut  
Marpol  
Vcar  
Crei

**Fig S22.** Coefficients of the logistic binomial regression model of ES prediction, plus their significance according to Wald test and its corresponding ANOVA deviance table with sequential Chi-square tests.



| Variable                  | Mean            | Standard deviation | Distribution type |
|---------------------------|-----------------|--------------------|-------------------|
| Gene length               | 9.29036105      | 1.09385885         | Log-normal        |
| CDS length                | 7.575259591     | 0.638614526        | Log-normal        |
| Exon length               | 4.750703651     | 0.475946827        | Log-normal        |
| Intron length             | Input-dependent | 1.21862551         | Log-normal        |
| 5' SS heterogeneity score | 9.267095764     | 0.850434144        | Normal            |
| 3' SS heterogeneity score | 5.146840410     | 0.479275742        | Normal            |

**Species list** **Total=24**

Mmus  
Mdom  
Ggal  
Xtro  
Drex  
Brabel  
Dmel  
Cele  
Cgig  
Ctel  
Hmag  
Nvex  
Aipt  
Mlei  
Aque  
Scil  
Cfra  
Sar3  
Atha  
Vvin  
Mgut  
Marpol  
Vcar  
Crei

**Fig S23.** Summary of input parameters for the simulation of genome architectures, including the distribution shape, means and standard deviations for each variable (gene, CDS, exon and intron lengths, and 5' and 3' SS heterogeneity). Includes the list of species employed in this analysis.

A) Mean intron length (bp) from PIC

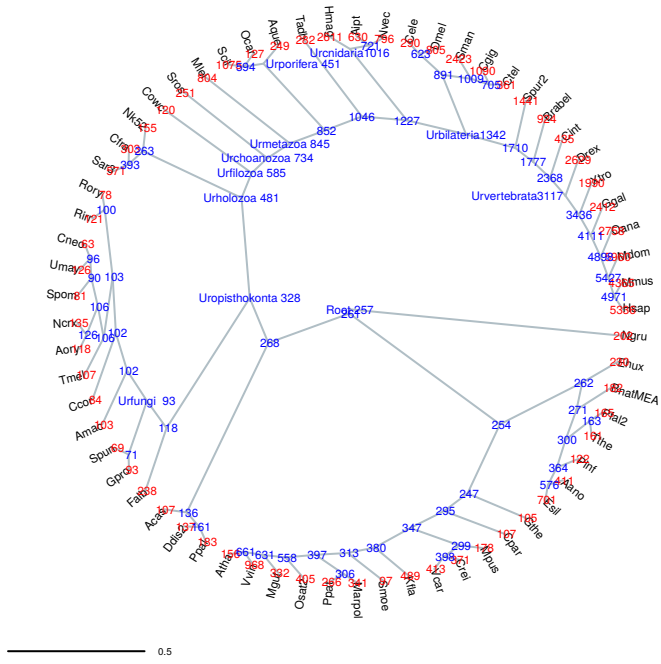

B) Q1 intron length (bp) from PIC

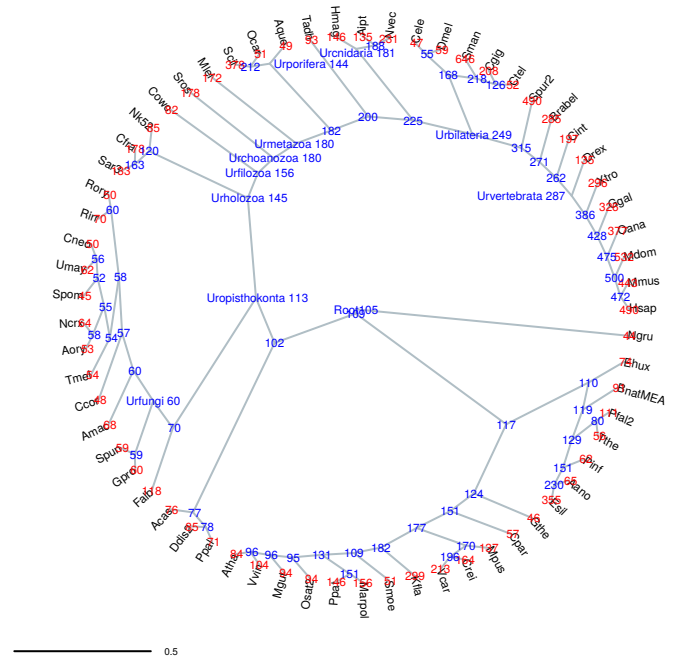

C) Q2 intron length (bp) from PIC

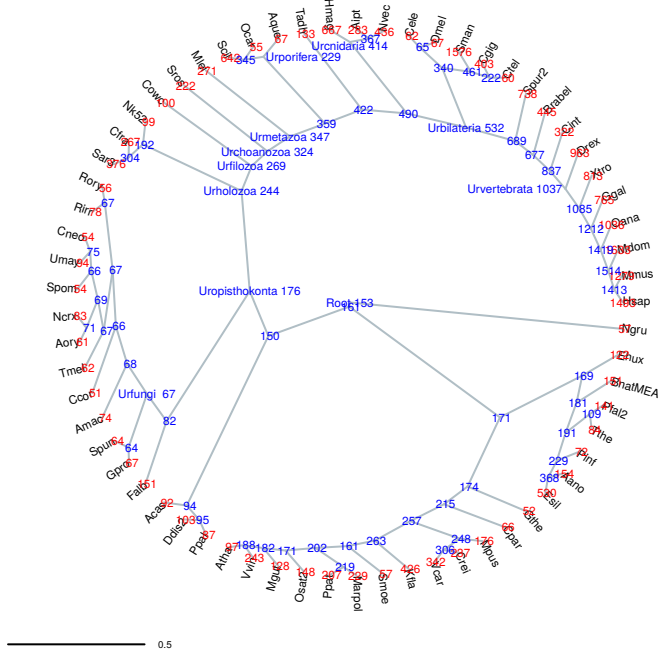

D) Q3 intron length (bp) from PIC

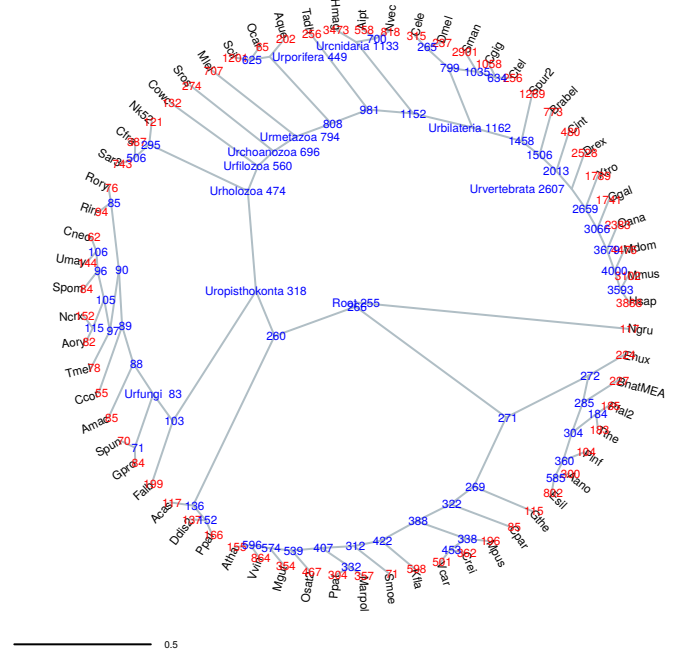

**Fig S24.** Estimations of ancestral intron length distributions using phylogenetically independent contrasts (PIC) under a 65-species phylogenetic tree obtained from the concatenation of 429 single-copy orthologs, using a constrained topology (see Methods).

Each tree displays the following statistics in ancestors (blue) and extant (red) organisms: A) mean, B) first quartile, C) second quartile and D) third quartile.

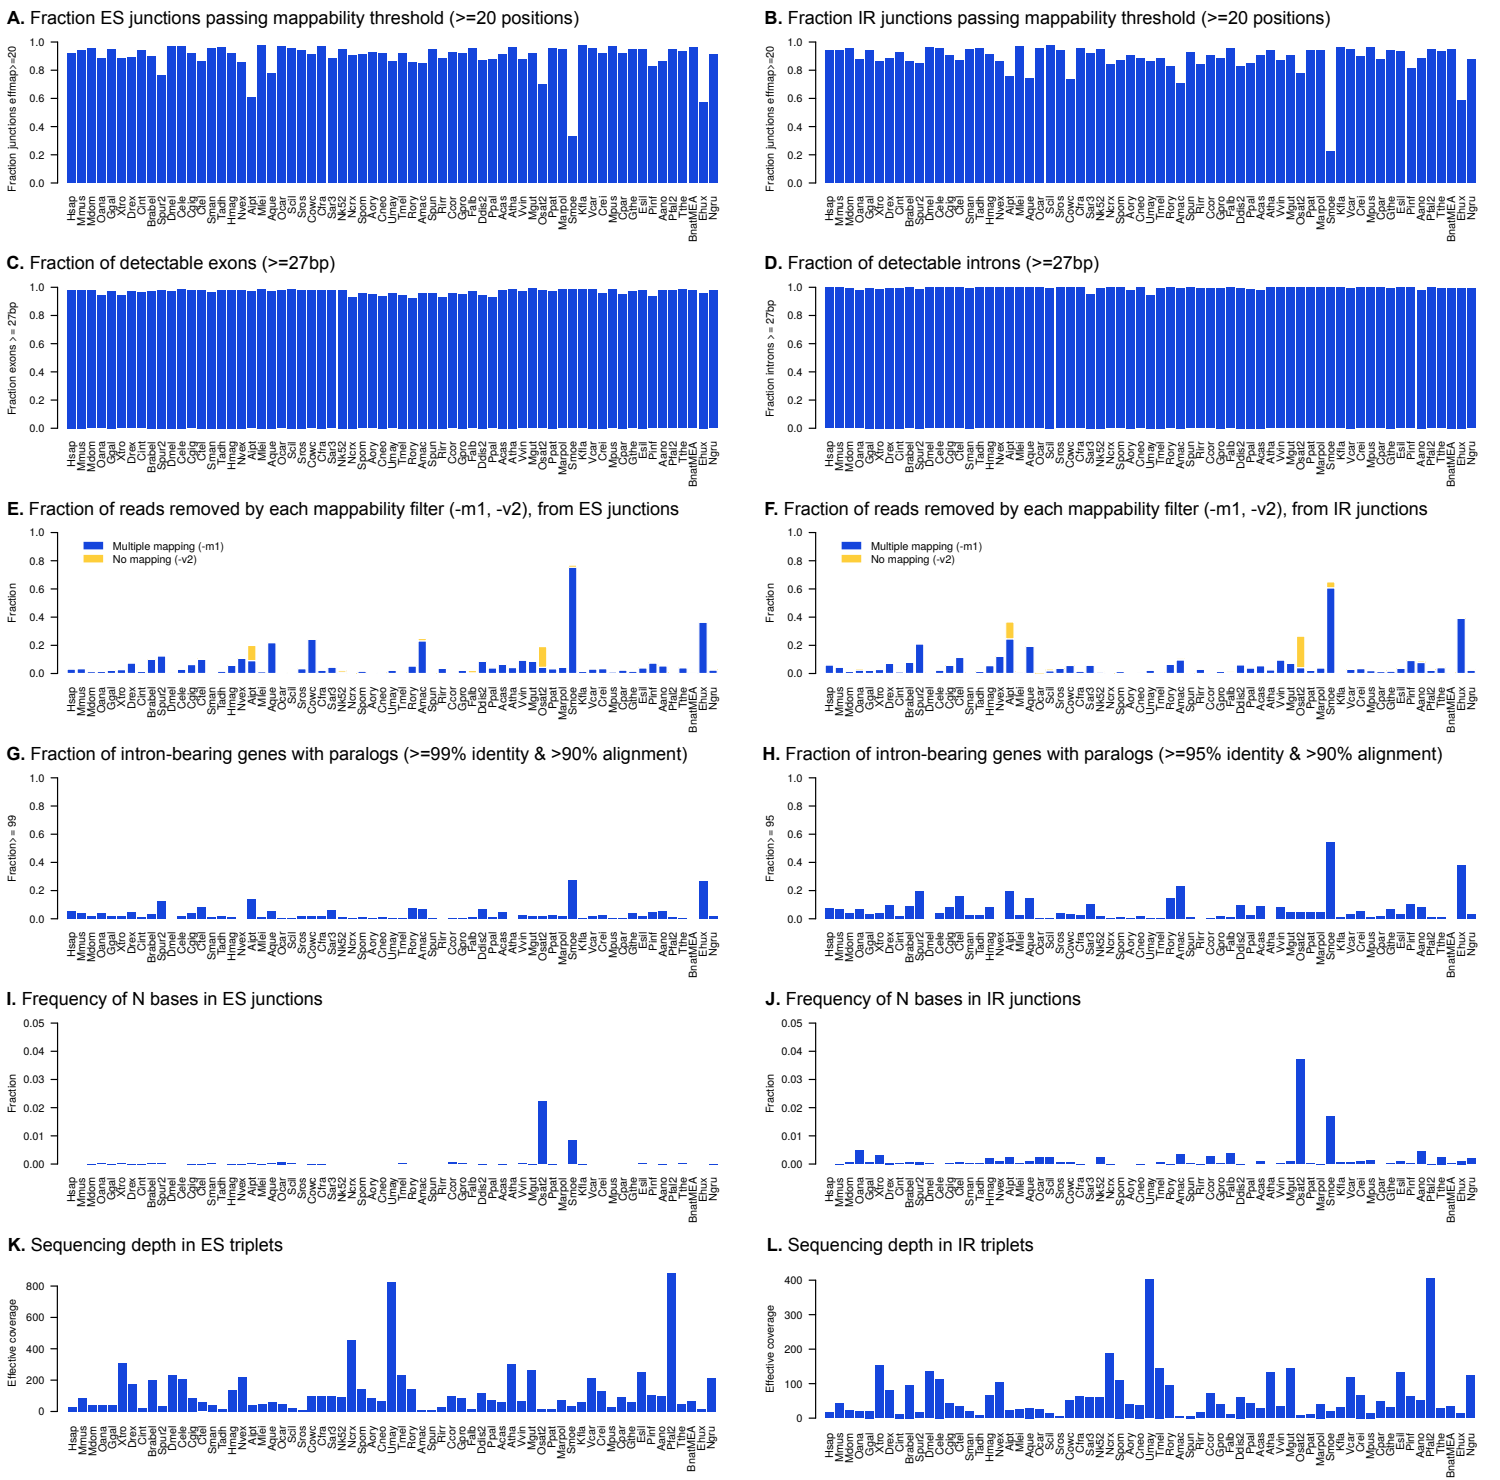

**Fig S25.** Quality control of the ES and IR detection procedures, analysing possible effects of genome architecture.

A-B) Fraction of exons and introns that pass the mappability filtering step ( $\geq 20$  mappable positions) in the ES and IR analyses, respectively.

C-D) Fraction of exons and introns with lengths above the minimal detection length imposed by the mappability filter ( $\geq 27$  bp for  $\geq 20$  mappable positions in a 84 bp junction).

E-F) Fraction of reads discarded in the RNA-seq mapping filters due to multiple mapping (-m1) or excess of mismatches (-v2), for ES and IR junctions respectively.

G-H) Fraction of intron-bearing genes with at least one close paralog (which can hinder RNA-seq mapping by multiple mapping problems), as measured using two thresholds:  $> 99\%$  or  $> 95\%$  amino acidic sequence identity, and  $> 90\%$  reciprocal sequence alignment.

I-J) Fraction of uncalled bases (N) in ES and IR junctions of each species, respectively (not scaled from 0-1).

K-L) Sequencing depths for the triplets of ES and IR junctions of each species, respectively (using mappability-corrected number of reads).
